1 **SARS-CoV-2 ORF6 disturbs nucleocytoplasmic trafficking to advance the viral replication**

2

3 Yoichi Miyamoto<sup>1\*</sup>, Yumi Itoh<sup>2</sup>, Tatsuya Suzuki<sup>2</sup>, Tomohisa Tanaka<sup>3</sup>, Yusuke Sakai<sup>4</sup>, Masaru Koido<sup>5</sup>, Chiaki  
4 Hata<sup>6</sup>, Cai-Xia Wang<sup>6</sup>, Mayumi Otani<sup>1</sup>, Kohji Moriishi<sup>3</sup>, Taro Tachibana<sup>6,7</sup>, Yoichiro Kamatani<sup>8</sup>, Yoshihiro  
5 Yoneda<sup>9</sup>, Toru Okamoto<sup>2\*</sup> and Masahiro Oka<sup>1</sup>

6

7 <sup>1</sup>Laboratory of Nuclear Transport Dynamics, National Institutes of Biomedical Innovation, Health and Nutrition  
8 (NIBIOHN), Osaka, Japan

9 <sup>2</sup>Institute for Advanced Co-Creation Studies, Research Institute for Microbial Diseases, Osaka University,  
10 Osaka, Japan.

11 <sup>3</sup>Department of Microbiology, Graduate School of Medicine, University of Yamanashi, Yamanashi, Japan

12 <sup>4</sup> Laboratory of Veterinary Pathology, Yamaguchi University, Yamaguchi, Japan

13 <sup>5</sup>Department of Cancer Biology, Institute of Medical Science, The University of Tokyo, Tokyo, Japan

14 <sup>6</sup>Cell Engineering Corporation, Osaka, Japan

15 <sup>7</sup>Department of Bioengineering, Graduate School of Engineering, Osaka City University, Osaka, Japan

16 <sup>8</sup>Department of Computational Biology and Medical Sciences, Graduate School of Frontier Sciences, The  
17 University of Tokyo, Tokyo, Japan.

18 <sup>9</sup>National Institutes of Biomedical Innovation, Health and Nutrition (NIBIOHN), Osaka, Japan

19

20 Corresponding authors

21 Yoichi Miyamoto

22 Laboratory of Nuclear Transport Dynamics, National Institutes of Biomedical Innovation, Health and Nutrition,

23 7-6-8 Saito-Asagi, Ibaraki, Osaka, 567-0085, Japan.

24 Tel: +81 72-641-9012

25 Email: ymiyamoto@nibiohn.go.jp (YM).

26

27 Toru Okamoto

28 Institute for Advanced Co-Creation Studies, Research Institute for Microbial Diseases, Osaka University, 3-1,

29 Yamada-oka, Suita, Osaka, 565-0871, Japan.

30 Tel: +81 6-6879-8330

31 Email: toru@biken.osaka-u.ac.jp (TO)

32

33 Running title: The SARS-CoV-2 interferon antagonist ORF6 directly binds to STAT1 and inhibits its nuclear

34 distribution

35

36 Keywords: coronavirus, COVID-19, nuclear transport, importin, interferon, STAT1, KPNA2

37

38 **ABSTRACT**

39 Severe acute respiratory syndrome coronavirus 2 (SARS-CoV-2) is the virus responsible for the coronavirus  
40 disease 2019 pandemic. ORF6 is known to antagonize the interferon signaling by inhibiting the nuclear  
41 translocation of STAT1. Here we show that ORF6 acts as a virulence factor through two distinct strategies. First,  
42 ORF6 directly interacts with STAT1 in an IFN-independent manner to inhibit its nuclear translocation. Second,  
43 ORF6 directly binds to importin  $\alpha$ 1, which is a nuclear transport factor encoded by *KPNA2*, leading to a  
44 significant suppression of importin  $\alpha$ 1-mediated nuclear transport. Furthermore, we found that *KPNA2* knockout  
45 enhances the viral replication, suggesting that importin  $\alpha$ 1 suppresses the viral propagation. Additionally, the  
46 analyses of gene expression data revealed that importin  $\alpha$ 1 levels decreased significantly in the lungs of older  
47 individuals. Taken together, SARS-CoV-2 ORF6 disrupts the nucleocytoplasmic trafficking to accelerate the  
48 viral replication, resulting in the disease progression, especially in older individuals.

## 49 INTRODUCTION

50 Coronavirus disease 2019 (COVID-19) pandemic is caused by the severe acute respiratory syndrome  
51 coronavirus 2 (SARS-CoV-2), which is a single-strand RNA virus belonging to the *Coronaviridae* family<sup>1,2,3</sup>.  
52 The genome of SARS-CoV-2 is approximately 29.7 kb long with short untranslated regions (UTR) at the 5' and  
53 3' termini, and encodes nonstructural (nsp1-16), structural (spike [S], envelope [E], membrane [M], and  
54 nucleocapsid [N]), and accessory proteins (ORF3a, ORF3b, ORF6, ORF7a, ORF7b, ORF8, and ORF10)<sup>4,5</sup>.

55 Among them, ORF6 is a small protein of approximately 7 kDa, which consists of 61 amino acids and  
56 exhibits a 69% homology with the SARS-CoV ORF6, from which it differs due to a two amino acids deletion  
57 at the C-terminus<sup>6</sup>. Several studies have recently shown that both the SARS-CoV and SARS-CoV-2 ORF6  
58 proteins antagonize the host innate immune system via the Janus activated kinase 1 (JAK1)- and JAK2-signal  
59 transducers and activators of transcription (STAT)<sup>6,7,8,9,10</sup>. STAT1 is a key mediator of cytokine-induced gene  
60 expression as it is activated by cytokines including type I and type II interferons (IFNs)<sup>11,12</sup>. Activation of JAKs  
61 associated with type I IFN receptor results in the tyrosine phosphorylation of STAT1 (PY-STAT1), leading to  
62 the formation of a STAT1-STAT2 heterodimer, while Type I interferon (IFN- $\alpha$  or - $\beta$ ) and type II interferon  
63 (IFN- $\gamma$ ) induce the formation of the PY-STAT1 homodimers. Both the hetero- and homo-dimer STAT1  
64 complexes translocate to the nucleus to bind the IFN-stimulated response elements (ISRE) or IFN- $\gamma$ -activated  
65 site (GAS)<sup>11,12</sup>. Previous studies indicated that ORF6 inhibits the nuclear transport of PY-STAT1 to suppress  
66 the primary interferon signaling<sup>7,8,9,10,13</sup>.

67 Constitutive and signal-dependent protein transports through the nuclear pore complexes (NPCs)  
68 embedded in the nuclear envelope are mediated by members of the importin (also known as karyopherin)  
69 superfamily<sup>14,15,16,17</sup>. The process of protein import into the nucleus commonly involves the recognition of a  
70 classical nuclear localization signal (cNLS) by the importin  $\alpha/\beta$ 1 heterodimer<sup>18,19</sup>. Cargos containing the cNLS  
71 are recognized by the adaptor molecule importin  $\alpha$  (also known as karyopherin  $\alpha$ : KPNA). Following the cNLS-  
72 containing cargo/importin  $\alpha/\beta$ 1 trimeric complex entrance into the nucleus through the NPCs, the cargo is

73 released from importin  $\alpha$  by binding of GTP-bound small GTPase Ran (RanGTP) to importin  $\beta$  <sup>18, 19, 20</sup>. After  
74 the complex dissociation, importin  $\alpha$  is exported to the cytoplasm by cellular apoptosis susceptibility gene  
75 product (CAS, also known as CSE1L) with RanGTP, and the importin  $\beta$ /RanGTP complex also returns to the  
76 cytoplasm, where it is reused for the next rounds of transport <sup>14, 20</sup>.

77         Seven importin  $\alpha$  proteins have been identified in humans, while six have been discovered in mice <sup>17</sup>,  
78 <sup>20, 21</sup>. Based on the sequence similarity, each importin  $\alpha$  protein is assigned to one of three conserved subfamilies.  
79 In humans, clade 1 consists of importin  $\alpha$ 5 (encoded by the *KPNA1* gene), importin  $\alpha$ 6 (*KPNA5*), and importin  
80  $\alpha$ 7 (*KPNA6*). Clade 2 consists of importin  $\alpha$ 1 (*KPNA2*) and importin  $\alpha$ 8 (*KPNA7*), and clade 3 consists of  
81 importin  $\alpha$ 3 (*KPNA4*) and importin  $\alpha$ 4 (*KPNA3*) <sup>20</sup>. The members of each subfamily display the cargo specificity  
82 and are differentially expressed in different tissues and cell types <sup>20, 21, 22, 23</sup>. Differences in the usage of “importin  
83  $\alpha$ ” or “KPNA” and the number of proteins in humans have often caused confusion. Therefore, in this study, we  
84 uniformly use the human nomenclature for “importin  $\alpha$ ” to refer to the protein and use the italic term “*KPNA*”  
85 to refer to the gene, while the normal term “KPNA” is described according to the way in which it is used in the  
86 citation.

87         It has already been demonstrated that the nuclear transport of the PY-STAT1 as a homodimer or a  
88 heterodimer with STAT2 is mediated by specific clade 1 subtypes of importin  $\alpha$  such as importin  $\alpha$ 5/KPNA1 <sup>24</sup>,  
89 <sup>25, 26, 27</sup>. According to the several studies on the viral proteins that inhibit the nuclear transport of PY-STAT1,  
90 SARS-CoV ORF6 has been reported to tether KPNA2, but not KPNA1, to ER to sequester importin  $\beta$ 1 into  
91 endoplasmic reticulum (ER)/Golgi apparatus, resulting in the suppression of nuclear import of PY-STAT1 <sup>7</sup>.  
92 Recently, SARS-CoV-2 ORF6 has also been shown to interact with KPNA2 <sup>10</sup> as well as both KPNA1 and  
93 KPNA2 <sup>9</sup>, further supporting its interference with the nuclear transport of PY-STAT1. On the other hand,  
94 SARS-CoV-2 ORF6 was shown to interact with the Nup98-RAE1 (NPC components) complex <sup>28</sup>, and to  
95 achieve the nuclear exclusion of STAT1 by binding to the Nup98-RAE1 complex rather than binding to importin

96  $\alpha$  proteins<sup>9</sup>. However, the exact molecular mechanism of the effects of SARS-CoV-2 ORF6 on the  
97 nucleocytoplasmic trafficking remains largely unknown.

98 In this study, therefore, we characterized the function of SARS-CoV-2 ORF6 on the  
99 nucleocytoplasmic protein transport. First of all, we examined the subcellular localization of ORF6 protein in  
100 cells infected with distinct SARS-CoV-2 strains using originally established antibodies, and also demonstrated  
101 that ORF6 functions as a virulence factor for COVID-19 using a hamster model and a newly produced replicon  
102 system. Furthermore, we found that ORF6 directly binds to STAT1 to suppress the IFN-induced nuclear  
103 localization and the nuclear shuttling in the absence of IFN-stimulation. In addition, the direct binding of ORF6  
104 to importin  $\alpha 1$  significantly reduces the cNLS-cargo transport, indicating that ORF6 influences importin  $\alpha 1$   
105 independently of STAT1. We also found that the viral replication of SARS-CoV-2 is enhanced in *KPNA2*  
106 knockout cells, suggesting that importin  $\alpha 1$  acts for the suppression of viral propagation. Lastly, the analyses of  
107 datasets from Genotype-Tissue Expression (GTEx) project indicated that the expression of importin  $\alpha 1$   
108 significantly decreases in the lungs of older individuals, suggesting that the importin  $\alpha 1$  levels might be related  
109 to the expansion of the COVID-19 illness. Thus, our results suggest that ORF6 plays a critical role in SARS-  
110 CoV-2 replication by disrupting the importin  $\alpha$ -mediated nucleocytoplasmic protein trafficking.

111 **RESULTS**

112 **ORF6 contributes to viral RNA replication and pathogenicity *in vivo***

113 To assess the ORF6 expression in SARS-CoV-2 infected cells, we first established an ORF6 specific antibody,  
114 and examined the protein in cells infected with different viral strains which were obtained from the National  
115 Institute of Infectious Diseases (NIID) in Japan, Hong Kong (HK)/VM20001061, USA-CA2, Germany/BavPat1,  
116 New York (NY)-PV09197, NY-PV08410, and NY-PV08449 (Fig. 1A). Indirect immunofluorescence analysis  
117 indicated that ORF6 was localized in the cytoplasm of the SARS-CoV-2 infected VeroE6/TMPRSS2 cells (Fig.  
118 1B), which is consistent with the previous observation in SARS-CoV infected Vero E6 cells <sup>29</sup>.

119 Next, we tried to know the roles of ORF6 in the viral life cycle of SARS-CoV-2. For this, the viral  
120 genome encoding ORF6 was replaced by that of NanoLuc, and a SARS-CoV-2 variant that does not express  
121 ORF6 (SARS-CoV-2/ $\Delta$ ORF6) was generated using the circular polymerase extension reaction (CPEP). As a  
122 parental virus, a recombinant virus expressing ORF6 fused with NanoLuc (NLuc) and Porcine teschovirus 2A  
123 peptide (SARS-CoV-2/NLuc2AORF6, Fig. S1) was generated. The deletion of ORF6 in SARS-CoV-2/ $\Delta$ ORF6  
124 was confirmed by western blotting (Fig. 1C). To assess the viral growth in Huh7-ACE2 cells, these recombinant  
125 viruses were inoculated at a MOI = 0.1, and then the viral RNA was determined from the culture supernatant.  
126 The viral RNA in the supernatant of cells infected with SARS-CoV-2/ $\Delta$ ORF6 was significantly decreased (Fig.  
127 1D).

128 Next, to evaluate the function of ORF6 *in vivo*, the parental virus (WT SARS-CoV-2) or SARS-CoV-  
129 2/ $\Delta$ ORF6 was intranasally inoculated in 4-week-old hamsters. Hamsters infected with SARS-CoV-2/ $\Delta$ ORF6  
130 showed significant weight gain 5 days post-infection, whereas those infected with the WT virus showed no  
131 significant change in the body weight (Fig. 1E). In addition, 5 days post-infection, the viral RNA was  
132 significantly reduced in the lung cells infected with SARS-CoV-2/ $\Delta$ ORF6 compared to those infected with the  
133 WT virus (Fig. 1F). Immunohistological analyses revealed that the viral nucleoprotein (NP) was expressed at

134 lower levels in the lung cells infected with SARS-CoV-2/ $\Delta$ ORF6 than in those infected with the WT virus (Fig.  
135 1G). These data suggest that ORF6 is involved in the viral replication and pathogenesis of COVID-19 *in vivo*.

136

### 137 **ORF6 inhibits the nuclear localization of STAT1 following the IFN stimulation**

138 Several studies have already shown that ORF6 inhibits the nuclear localization of STAT1 in response to type-I  
139 IFN (IFN- $\alpha$  or - $\beta$ ) stimulation<sup>7, 8, 9, 10, 13</sup>. Here, we attempted to verify the inhibitory effect of SARS-CoV-2  
140 ORF6 on a type-II IFN (IFN- $\gamma$ )-activated STAT1. The AcGFP fused ORF6 was transfected into HeLa cells, and  
141 the subcellular localization of PY-STAT1 was observed when the cells were stimulated with either IFN- $\beta$  or  
142 IFN- $\gamma$ . While the PY-STAT1 was localized in the nucleus of AcGFP-transfected cells in response to each  
143 treatment, the distribution was markedly shifted to the cytoplasm in the AcGFP-ORF6-transfected cells (Fig.  
144 2A, B). The fluorescence intensity ratio of the nucleus against the whole cells further supported the significant  
145 nuclear exclusion of the PY-STAT1 in the AcGFP-ORF6-transfected cells when stimulated by IFN- $\gamma$  (Fig. 2C).

146 Next, in order to confirm that the PY-STAT1 is excluded from the nucleus by ORF6, we evaluated the  
147 expression of PY-STAT1 downstream genes using quantitative RT-PCR (qRT-PCR). In comparison to the  
148 AcGFP-transfected control cells, the AcGFP-ORF6-transfected cells showed significant down-regulation of  
149 IFN- $\gamma$ -inducible protein 10 (*IP-10*)<sup>30</sup> mRNA 6 h post-transfection or later upon stimulation (Fig. 2D). To clarify  
150 whether the nuclear exclusion of PY-STAT1 by ORF6 affects the expression of the IFN-stimulated response  
151 element (ISRE)-containing gene, a luciferase assay was performed in Huh7 cells. The cells were transfected  
152 with a luciferase reporter plasmid including ISRE together with AcGFP or AcGFP-ORF6. We observed a  
153 significant repression of the relative luciferase values in the AcGFP-ORF6-transfected cells compared to that  
154 of AcGFP-transfected cells (Fig. 2E). Finally, we confirmed that the relative ISRE luciferase value was  
155 significantly suppressed when the SARS-CoV-2 infected cells were stimulated by IFN- $\gamma$  (Fig. 2F). These results  
156 indicate that SARS-CoV-2 ORF6 suppresses the nuclear translocation of PY-STAT1 to inhibit the activation of  
157 STAT1-downstream genes.



158

159 **The C-terminal region of ORF6 aids the acceleration of viral replication**

160 Previously, the C-terminal region of ORF6 was shown to be involved in the inhibition of IFN response<sup>8</sup>. Hence,  
161 in line with the previous findings, we validated the effects of ORF6 C-terminal mutations on the nuclear  
162 translocation of PY-STAT1. As a result, we found that the ORF6 mutant with alanine replacing amino acids 49  
163 to 52 (referred to as ORF6-M1) retained the inhibitory effect over PY-STAT1, while the other mutants with  
164 alanine replacing amino acids 53 to 55 (ORF6-M2) and 56 to 61 (ORF6-M3) did not retain their inhibitory  
165 functions (Fig. 3A-C).

166 To further assess the function of ORF6 in viral propagation, we established a replicon system in which  
167 we can evaluate the viral replication process by detecting the Renilla luciferase (RLuc) (Fig. 3D). The replicon  
168 plasmid was transfected together with AcGFP or AcGFP-ORF6 in Huh7 cells and the RLuc values were  
169 analyzed 24 h post-transfection. We found that the expression of WT ORF6 and ORF6-M1, but not ORF6-M2  
170 and ORF6-M3, significantly enhanced the viral replication (Fig. 3E), consistent with the effects on STAT1  
171 nuclear localization. These results suggest that the C-terminal regions (amino acids 53 to 61) of ORF6 plays an  
172 important role to inhibit the interferon signaling by disrupting the nuclear localization of PY-STAT1, resulting  
173 in the enhancement of the viral replication of SARS-CoV-2.

174

175 **ORF6 directly binds to STAT1 in an IFN-independent manner**

176 Next, in order to characterize the interplay between ORF6 and STAT1 in more detail, we analyzed the  
177 subcellular distribution of Flag-tagged STAT1 in AcGFP-ORF6-transfected HeLa cells. In addition to the WT  
178 ORF6, the in-frame 9 amino acids deletion mutant (loss of amino acids 22 to 30; referred to as ORF6 $\Delta$ 9) which  
179 were reported in the previous works<sup>31, 32</sup> was also examined. Under non-stimulated conditions, Flag-STAT1  
180 was mainly localized in the cytoplasm in either AcGFP-, AcGFP-ORF6- or AcGFP-ORF6 $\Delta$ 9-transfected cells  
181 (Fig. 4A, B). Upon IFN- $\gamma$  stimulation, Flag-STAT1 was distributed into the nucleus in the AcGFP-transfected

182 cells. In contrast, it was retained in the cytoplasm in AcGFP-ORF6 WT- and  $\Delta 9$ -transfected cells (Fig. 4C, D).  
183 Interestingly, statistical analysis revealed that even under non-stimulated conditions, the cytoplasmic intensities  
184 of Flag-STAT1 were significantly higher in the AcGFP-ORF6 WT- or  $\Delta 9$ -transfected cells compared to those  
185 observed in the AcGFP-transfected control cells (Fig. 4B), suggesting that STAT1 may shuttle between the  
186 nucleus and the cytoplasm in the absence of IFN stimulation and be trapped in the cytoplasm by ORF6.

187 Therefore, to address the possibility of the interaction between ORF6 and non-activated STAT1, we  
188 first performed an immunoprecipitation assay using AcGFP-ORF6 (HA-ORF6)- and Flag-STAT1-transfected  
189 cells. As a result, we found that HA-ORF6 was precipitated with Flag-STAT1 in the absence of IFN stimulation  
190 (Fig. 4E). Next, to know whether ORF6 directly binds to STAT1, bacterially purified recombinant STAT1  
191 protein was incubated with either recombinant GST-GFP or recombinant GST-GFP fused ORF6 full-length  
192 protein (GST-GFP-ORF6). Fig. 4F showed that STAT1 was directly bound to GST-GFP-ORF6. To address  
193 whether the binding of ORF6 to STAT1 is mediated by the amino acids 49-61 in the C-terminal region (referred  
194 to as M0 in this study, see Fig. 3A), we produced a recombinant protein consisting of the 13 amino acids (M0)  
195 which was fused to GST and GFP (GST-M0-GFP). As shown in Fig. 4G, the pull-down assay clearly revealed  
196 that STAT1 was bound to the GST-M0-GFP protein. Taken together, we conclude that ORF6 directly binds to  
197 STAT1 through the C-terminus in the absence of IFN stimulation, meaning that ORF6 binds to the resting state  
198 of STAT1 in the cytoplasm.

199

## 200 **ORF6 alters the subcellular distribution of importin $\alpha$ proteins**

201 Previous studies showed that the SARS-CoV- and SARS-CoV-2-associated inhibition of nuclear translocation  
202 of STAT1 is accomplished through the interaction between ORF6 and importin  $\alpha 1$ /KPNA2<sup>7, 10</sup>. However, as  
203 described above, ORF6 binds directly to STAT1 in the absence of IFN stimulation in the cytoplasm, which  
204 raises a possibility that the binding of ORF6 to importin  $\alpha$  proteins might not be required to inhibit the nuclear  
205 accumulation of STAT1. Therefore, we attempted to examine the interplay between the ORF6 and importin  $\alpha$

206 proteins. Since ORF6 has been shown to alter the distribution of importin  $\alpha$ 1/KPNA2 and/or importin  
207  $\alpha$ 5/KPNA1<sup>7,9</sup>, we first validated these findings concerning all human importin  $\alpha$  subtypes. Consistent with the  
208 previous reports, in AcGFP-transfected cells (control), the overexpressed Flag-importin  $\alpha$  proteins were mainly  
209 localized in the nucleus (Fig. 5A, B, Fig. S2). In contrast, in AcGFP-ORF6-transfected cells, the localization of  
210 Flag-importin  $\alpha$ 1,  $\alpha$ 3,  $\alpha$ 4,  $\alpha$ 6, and  $\alpha$ 8 remarkably changed to the cytoplasm, while Flag-importin  $\alpha$ 5 and  $\alpha$ 7 were  
211 still mostly localized in the nucleus (Fig. 5A, B, Fig. S2). The analysis of nuclear fluorescence intensities ratio  
212 clearly showed that in AcGFP-ORF6-transfected cells, the nuclear distribution of Flag-importin  $\alpha$ 1 was  
213 drastically shifted to the cytoplasm, while the Flag-importin  $\alpha$ 5 was mainly retained in the nucleus (Fig. 5C).  
214 These data indicate that ORF6 has distinct effects on each importin  $\alpha$  subtype.

215

#### 216 **Importin $\alpha$ 1 shuttles between the nucleus and the cytoplasm in the presence of ORF6**

217 Next, we examined whether ORF6 directly binds to importin  $\alpha$  proteins. Purified recombinant GST-GFP-ORF6  
218 was incubated with Flag-importin  $\alpha$ 1 or Flag-importin  $\alpha$ 5, respectively, and then the GST-proteins were pulled-  
219 down using glutathione Sepharose beads to know whether the Flag-importin  $\alpha$  proteins were co-precipitated or  
220 not. Using western blotting, we identified that Flag-importin  $\alpha$ 1, but not Flag-importin  $\alpha$ 5, mainly binds to  
221 ORF6 (Fig. 5D).

222 Direct binding of ORF6 to importin  $\alpha$ 1 suggest a possibility that ORF6 may inhibit the mobility of  
223 importin  $\alpha$ 1 to tether it in the cytoplasm, as reported previously with SARS-CoV ORF6<sup>7</sup>. Therefore, we next  
224 tried to know whether importin  $\alpha$ 1 moves from the cytoplasm to the nucleus even in the presence of ORF6. For  
225 this, we focused on the characteristic feature of importin  $\alpha$ 1 that it accumulates in the nucleus in response to  
226 cellular stresses such as oxidative stress<sup>33,34</sup>. That is, it has been clearly demonstrated that while in unstressed  
227 cells importin  $\alpha$ 1 shuttles between the nucleus and the cytoplasm, in stressed cells importin  $\alpha$ 1 accumulates in  
228 the nucleus due to the inhibition of RanGTP-dependent nuclear export of importin  $\alpha$  by a collapse in the RanGTP  
229 gradient<sup>33,34</sup>. Therefore, we speculated that if importin  $\alpha$ 1 cannot move from the cytoplasm to the nucleus by

230 ORF6, we cannot observe its nuclear accumulation under stress conditions. Hence, HeLa cells were transfected  
231 with AcGFP-ORF6 and Flag-importin  $\alpha$ 1 and treated with 200  $\mu$ M of H<sub>2</sub>O<sub>2</sub> for 1 h. Unexpectedly, we found  
232 that under the oxidative stress conditions, Flag-importin  $\alpha$ 1 was localized into the nucleus in the ORF6-  
233 transfected cells (Fig. 5E, F). The same phenomenon was also observed for endogenous importin  $\alpha$ 1 (Fig. S3A-  
234 C). Thus, these results mean that although importin  $\alpha$ 1 seems to be tethered in the cytoplasm in the ORF6-  
235 transfected cells, it retains its original capacity to move between the nucleus and the cytoplasm even in the  
236 ORF6-transfected cells. Taken together with the results that the subcellular localization of neither importin  $\beta$ 1  
237 nor CAS, the export factor for importin  $\alpha$ , was dramatically altered in the ORF6-transfected cells (Fig. S3D, E),  
238 it is most likely that the nuclear exclusion of STAT1 by ORF6 is not due to the cytoplasmic tethering of importin  
239  $\alpha$ 1.

240

#### 241 **ORF6 negatively regulates the importin $\alpha$ / $\beta$ 1 pathway**

242 As described above, since we found that ORF6 directly binds to importin  $\alpha$ 1, we next tried to know whether  
243 ORF6 directly affects the importin  $\alpha$ 1-mediated nuclear transport pathway or not. For this, HeLa cells were  
244 transfected with mCherry fused SV40T-NLS (mCherry-NLS) together with AcGFP or AcGFP-ORF6, and then  
245 the nuclear intensities of the fluorescent substrate were measured. Although the majority of mCherry-NLS was  
246 observed in the nucleus of AcGFP-ORF6-transfected cells, its cytoplasmic proportion was significantly  
247 increased compared to that observed in the AcGFP-transfected control cells (Fig. 6A, B).

248 Next, we compared the binding ability of importin  $\alpha$ 1 to the cNLS-containing cargo (GST-NLS-GFP)  
249 and ORF6 (GST-GFP-ORF6). The GST pull-down assay showed that importin  $\alpha$ 1 more efficiently interacted  
250 with cNLS than ORF6 (Fig. 6C). To assess the inhibitory effects of ORF6 on the importin  $\alpha$ / $\beta$ 1-mediated nuclear  
251 transport of GST-NLS-mRFP, a digitonin-permeabilized semi-intact nuclear transport assay was performed. As  
252 a result, we observed that the addition of excess amounts of ORF6 significantly inhibited the nuclear

253 translocation of the cNLS-cargo (Fig. 6D, E), suggesting that ORF6 affects the importin  $\alpha/\beta$ 1 pathway, when it  
254 exists in large quantities in cells.

255 To further investigate the effects of ORF6 on other important signaling pathways mediated by importin  
256  $\alpha/\beta$ 1 other than STAT1, we focused on the following signaling molecules, hypoxia inducible factor 1 $\alpha$  (HIF-  
257 1 $\alpha$ ) and Nuclear factor-kappa B (NF- $\kappa$ B) component p65/RelA, since they have been shown to be transported  
258 into the nucleus by several importin  $\alpha$  proteins<sup>35,36,37</sup>. First, HeLa cells were transfected with AcGFP or AcGFP-  
259 ORF6, and then treated with 200  $\mu$ M cobalt chloride (CoCl<sub>2</sub>) for 5 h to induce the nuclear accumulation of HIF-  
260 1 $\alpha$ . On the other hand, the nuclear migration of NF- $\kappa$ B p65 was investigated using AcGFP- or AcGFP-ORF6-  
261 transfected cells treated with 20 ng/mL tumor necrosis factor- $\alpha$  (TNF- $\alpha$ ) for 30 min. As a result, the nuclear  
262 accumulations of both of HIF-1 $\alpha$  (Fig. 6F, G) and NF- $\kappa$ B p65 (Fig. 6H, I) were significantly suppressed in the  
263 AcGFP-ORF6-transfected cells. Notably, the inhibitory effects of ORF6 on these two importin  $\alpha/\beta$ 1-mediated  
264 signaling molecules were reduced compared to that on STAT1. These results totally suggest that the SARS-  
265 CoV-2 might negatively regulate the importin  $\alpha/\beta$ 1-mediated protein trafficking into the nucleus through the  
266 moderate binding of ORF6 to importin  $\alpha$ 1.

267

### 268 **Knockout of *KPNA2* enhances the replication of SARS-CoV-2**

269 Since importin  $\alpha$ 1 might be one of the target molecules for SARS-CoV-2 ORF6, we further examined the roles  
270 of importin  $\alpha$ 1 on the propagation of SARS-CoV-2. The *KPNA2* gene, which encodes importin  $\alpha$ 1, was knocked  
271 out in Huh7-ACE2 cells using a single-guide RNA (sgKPNA2), and then the knockout (KO) cells were infected  
272 by SARS-CoV-2. After 6, 12, and 24 h post-infection, the viral RNA levels and viral titer were measured using  
273 the culture supernatant. Both viral RNA levels and viral titer significantly increased in the *KPNA2* KO cells 24  
274 h following infection (Fig. 6J, K). These results suggest that importin  $\alpha$ 1 plays a suppressive function on the  
275 SARS-CoV-2 replication and that SARS-CoV-2 ORF6 might attenuate the function of importin  $\alpha$ 1 to achieve  
276 an efficient viral propagation.

277

278 **Global analysis for *KPNA2* in different tissues and at different ages**

279 To further understand the role of the importin  $\alpha 1$  in the propagation of SARS-CoV-2 and ultimately the COVID-  
280 19 pandemic, we assessed whether the patients' importin  $\alpha 1$  expression profiles are associated with COVID-19  
281 symptoms. Using the GTEx dataset, we analyzed whether the importin  $\alpha 1$  expression level in lung tissues and  
282 whole blood cells, with sexes as well as across age is correlated with symptoms using the European ancestry  
283 (EUR) samples. We found that the importin  $\alpha 1$  levels significantly decreased with ages in lung tissues (Fig. 7A)  
284 and that the tendency was associated with males rather than female (Fig. 7B). On the other hand, the expression  
285 levels in whole blood increased in an age-dependent manner in both sexes (Fig. 7C, D). We also found that the  
286 *KPNA2* expression levels in the lungs were significantly lower in Asian ancestry than those in European, African,  
287 and other ancestries (Fig. S5). These data suggest that the low expression level of importin  $\alpha 1$  in the lungs might  
288 represent a COVID-19-associated concern observed in older patients, particularly for males, and be one of the  
289 risk factors for infection of SARS-CoV-2.

290 **DISCUSSION**

291 In this study, we demonstrated that SARS-CoV-2 ORF6 plays an important role in viral replication and  
292 pathogenesis of COVID-19 *in vivo*. In addition, we discovered that ORF6 acts on the nucleocytoplasmic  
293 signaling via two distinct ways. That is, first, ORF6 inhibits the nuclear translocation of one of the key signaling  
294 molecules for COVID-19, STAT1, through its direct binding to antagonize the IFN signaling. Second, ORF6  
295 directly affects the function of importin  $\alpha$  to impair the nuclear transportation of cNLS-containing cargos  
296 including signaling molecules such as HIF-1 $\alpha$  and NF- $\kappa$ B p65.

297 A previous study reported that SARS-CoV ORF6 tethered importin  $\alpha$ 1/KPNA2, but not importin  
298  $\alpha$ 5/KPNA1, to the ER and, as a result, sequestered importin  $\beta$ 1 into the ER/Golgi segment through the  
299 interaction with importin  $\alpha$ 1, resulting in the inhibition of PY-STAT1 nuclear import <sup>7</sup>. Since the nuclear  
300 transport of PY-STAT1 is known to be mediated by importin  $\alpha$ 5/KPNA1 <sup>24, 25</sup> and we showed here that importin  
301  $\alpha$ 1 can enter the nucleus even in the presence of ORF6 under oxidative stress conditions, it is unlikely that  
302 SARS-CoV-2 ORF6 tethers importin  $\alpha$ 1 to the ER to cause the nuclear exclusion of STAT1.

303 In contrast, we found that the Flag-STAT1 was more abundantly localized in the cytoplasm in the  
304 absence of IFN stimulation in the ORF6-transfected cells than in the control WT cells (Fig. 4A, B). It was  
305 previously demonstrated that unphosphorylated STAT1 shuttles between the nucleus and the cytoplasm, and  
306 this shuttling might play an important role in regulating the expression of IFN stimulated genes <sup>12, 38, 39, 40</sup>.  
307 Moreover, in this study, we found that the bacterially purified STAT1 proteins, which are not phosphorylated,  
308 binds to ORF6. Since the phosphorylation of STAT1 has been shown to be unaffected by ORF6 upon the IFN  
309 stimulation <sup>8, 10</sup>, the interaction between ORF6 and STAT1 might occur in a phosphorylation-independent  
310 manner. Collectively, we propose a scenario that the nuclear exclusion of STAT1 is caused by the direct binding  
311 with ORF6 independently of importin  $\alpha$  proteins.

312 On the other hands, we found that the subcellular localizations of all importin  $\alpha$  subtypes were altered  
313 in ORF6-transfected cells, suggesting a possibility that ORF6 directly or indirectly influences the importin  $\alpha$ / $\beta$ 1-

314 mediated nuclear transport pathways. Consistent with this possibility, we further found that the nuclear  
315 accumulation of the mCherry-NLS substrate was significantly reduced in the AcGFP-ORF6-transfected cells.  
316 In addition, using the semi-intact nuclear transport assay, we demonstrated that the addition of ORF6 inhibits  
317 the nuclear transportation of GST-NLS-mRFP. Furthermore, we found that ORF6 negatively regulates the  
318 nuclear import of HIF-1 $\alpha$  and NF- $\kappa$ B p65, which have been already shown to be mediated by importin  $\alpha$  proteins  
319 <sup>35, 36, 37</sup>. Since the nucleocytoplasmic trafficking is vital for cell survival, SARS-CoV-2, therefore, should avoid  
320 antiviral immune signaling without affecting cell survival to develop COVID-19.

321           Recently, it has been shown that the specific interaction of ORF6 with the NPC components, Nup98  
322 and Rae1, might disrupt the nuclear transport <sup>9, 28, 41</sup>. Consistently, it has been already known that the hijacking  
323 of the NPC components suppresses the host mRNA export system <sup>41</sup>. Moreover, Miorin et al. provided a  
324 supporting evidence that the arginine substitution at residue 58 of ORF6 abolishes its IFN antagonistic function  
325 <sup>9</sup>. In this study, we demonstrated that STAT1 binds to ORF6 via the residues 49-61 from the C-terminus (M0)  
326 which contains a methionine amino acid at the 58 position. Furthermore, we found that this C-terminal region  
327 of ORF6 plays a critical role in altering the subcellular localization of importin  $\alpha$ 1. Taken together, we propose  
328 that the ORF6 negatively regulates the nucleocytoplasmic trafficking through the binding with importin  $\alpha$ 1 and  
329 some NPC components. Considering that various mutations and deletions have been found in ORF6 <sup>31, 42</sup>, further  
330 studies will be required to understand how ORF6, especially its C-terminus region functions for the viral  
331 infection in order to utilize it as a therapeutic target.

332           Consistently, we found that the viral propagation of SARS-CoV-2 is enhanced in *KPNA2* KO cells. In  
333 addition, the GTEx dataset revealed that the *KPNA2* levels in lung tissue significantly decrease with the  
334 advancement in age, and that this decrease is more remarkable in males than in females. Moreover, the another  
335 GTEx analysis indicated that the levels of *KPNA2* in the lungs tend to be lower in Asians than in other genetic  
336 ancestries, although further data need to be required to make a definite conclusion, since the sample size for the  
337 Asian group is smaller than that of the other groups. Since hypoxia has been recognized as a pathogenic factor



338 in COVID-19 patients<sup>43,44</sup>, we suspect that ORF6 might impair the nuclear import of HIF-1 $\alpha$ , which is required  
339 for the response to hypoxia, to affect lung cell functions in the COVID-19 patients, so that the lung oxygen  
340 levels cannot be maintained appropriately. Thus, the downregulation of importin  $\alpha 1$  may accelerate the  
341 replication of the virus in the lungs, in particular in older individuals. In conclusion, we propose that in the lungs  
342 of older individuals, SARS-CoV-2 ORF6 exhibits dual effects on the viral proliferation by inhibiting the STAT1  
343 signaling and negatively regulating the importin  $\alpha/\beta 1$ -mediated nuclear transport pathways to avoid the  
344 interferon immune responses. Understanding the effects of SARS-CoV-2 proteins on the nucleocytoplasmic  
345 trafficking system might provide a novel approach for COVID-19 therapeutics.

## 346 MATERIALS AND METHODS

### 347 *Animal care, and the production of monoclonal antibody*

348 All animal experiments using the SARS-CoV-2 virus were performed in biosafety level 3 (ABSL3) facilities at  
349 the Research Institute for Microbial Diseases, Osaka University. The animal experiments, and the study protocol  
350 were approved by the Institutional Committee of Laboratory Animal Experimentation of the Research Institute  
351 for Microbial Diseases, Osaka University (R02-08-0). Throughout the study, we focused on minimizing animal  
352 suffering and to reducing the number of animals used in the experiments. Four weeks-old male Syrian hamsters  
353 were purchased from SLC (Shizuoka, Japan).

354 Experimental procedures in production of monoclonal antibody were approved by the CEC Animal  
355 Care and Use Committee (permission number: CMJ-044) and performed according to CEC Animal  
356 Experimentation Regulations. A rat monoclonal antibody that specifically recognized the SARS-CoV-2 ORF6  
357 protein was generated using the rat medial iliac lymph node method <sup>45</sup>. An 8-week-old female WKY rat was  
358 injected into the rear footpads with 100  $\mu$ L of emulsions containing ORF6 peptide (CEEQPMEID)-conjugated  
359 KLH and Freund's complete adjuvant. Seventeen days after the first immunization, an additional immunization  
360 of SARS-CoV-2 ORF6 peptide-KLH was administered without an adjuvant into the tail base of the rat. Four  
361 days after the second immunization, cells from the iliac lymph nodes of the immunized rat were fused with  
362 mouse myeloma Sp2/0-Ag14 cells at a ratio of 5:1 in 50% polyethylene glycol. The resulting hybridoma cells  
363 were plated onto 96-well plates and cultured in HAT selection medium (Hybridoma-SFM [Life Technologies,  
364 Grand Island, CA, USA]; 10% FBS; 1 ng/mL mouse IL-6; 100  $\mu$ M hypoxanthine [Sigma-Aldrich, St. Louis,  
365 MO, USA]; 0.4  $\mu$ M aminopterin [Sigma-Aldrich]; and 16  $\mu$ M thymidine [WAKO, Osaka, Japan]). The SARS-  
366 CoV-2 ORF6-specific antibody was screened using ELISA, western blotting, and immunostaining of hybridoma  
367 supernatants. Finally, hybridoma clone producing the monoclonal antibody later named 8B10, was selected.  
368 Using a rat isotyping kit the MAb 8B10 was found to be an IgG 1 (k) antibody subtype. The monoclonal antibody  
369 against SARS-CoV-2 NP (3A9 clone) was generated by Cell Engineering Corporation (Osaka, Japan).

370

371 *Viruses*

372 The SARS-CoV-2 (2019-nCoV/Japan/TY/WK-521/2020) strain was isolated at the National Institute of  
373 Infectious Diseases (NIID). The Germany/BavPat1/2020, USA-CA2/20200 (USA-CA2), NY-PV08410/2020,  
374 HK/VM20001061, NY-PV08449/2020, NY-PV09197/2020 were obtained from BEI Resources (Manassas, VA,  
375 USA). The different strains of SARS-CoV-2 were used to infect VeroE6/TMPRSS2 cells cultured at 37 °C with  
376 5% CO<sub>2</sub> in DMEM (WAKO, Osaka, Japan) containing 10% fetal bovine serum (FBS; Gibco, Grand Island,  
377 NY, USA) and penicillin/streptomycin (100 U/mL, Invitrogen, Carlsbad, CA, USA). The viral stock was  
378 generated by infecting VeroE6/TMPRSS2 cells at an MOI of 0.1. The viral supernatant was harvested at two  
379 days post infection and the viral titer was determined using plaque assay.

380

381 *Plasmid construction for mammalian expression*

382 The AcGFP and HA were amplified and cloned into pCAGGS vector designed as pCAG AcGFP-HA. The  
383 cDNA of ORF6 was obtained from Vero-TMPRSS2 cells infected with SARS-CoV-2. The wild type ORF6,  
384 ORF6-M1, ORF6-M2 and ORF6-M3 were amplified and cloned into pCAG AcGFP-HA designed as pCAG  
385 AcGFP-ORF6-HA, pCAG AcGFP-ORF6M1-HA, pCAG AcGFP-ORF6M2-HA, and pCAG AcGFP-ORF6M3-  
386 HA, respectively. The ORF6 $\Delta$ 9 was constructed using the method of splicing by overlap extension method  
387 (ORF6 $\Delta$ 9-N and -C). The primers used throughout the study are described in Table S1. All cDNAs were  
388 amplified using polymerase chain reaction (PCR) and the Tks Gflex DNA Polymerase (Takara Bio., Shiga,  
389 Japan). The amplified cDNAs were cloned into the indicated plasmids using an In-Fusion HD cloning kit  
390 (Clontech, Mountain View, CA, USA). The sequences of all plasmids were confirmed by Eurofins Genomics  
391 (Tokyo, Japan).

392 Full-length STAT1 was amplified from a previously subcloned plasmid<sup>46</sup> using the primers described  
393 in Table S1. The PCR products were cloned into a pcDNA5/FRT/3xFLAG expression vector<sup>47</sup>. Human

394 importin  $\alpha$ s including importin  $\alpha$ 1/KPNA2 and importin  $\alpha$ 5/KPNA1 were cloned into a pcDNA5/FRT/FLAG  
395 expression vector, as previously described <sup>47</sup>. For constructs encoding the SV40T antigen NLS (NLS;  
396 PKKKRKVED), the relevant oligonucleotides (Table S1) were ligated into the pmCherry-C1 vector (Clontech).

397  
398 ***Plasmid constructions for bacterially expressed recombinant proteins***

399 Full-length ORF6 cDNA was amplified using the specific primers described in Table S1. The PCR products  
400 were cloned into a pGEX6P2 vector (Clontech) which was subcloned the GFP gene at the N-terminus <sup>48</sup>.  
401 Construct integrity was confirmed by DNA sequencing. For constructs encoding the C-terminus of ORF6 (M0),  
402 the relevant oligonucleotides (Table S1) were ligated into a pGEX2T-GFP vector, which contained the GFP  
403 gene at the multicloning site; thus, producing the pGEX2T-M0-GFP vector. The plasmid pGEX6P2/hSTAT1  
404 was subcloned from the pcDNA5/FRT/3xFLAG expression vector. The plasmids pGEX6P3/flag-human-  
405 importin  $\alpha$ 1 and pGEX6P3/flag-human-importin  $\alpha$ 5 were obtained as previously described <sup>24, 47</sup>. The relevant  
406 oligonucleotides of SV40T NLS was ligated to the pGEX2T vector containing the monomeric RFP (mRFP)  
407 gene at the multicloning site; thus, producing the pGEX2T-NLS-mRFP vector.

408  
409 ***Purification of bacterially expressed recombinant proteins***

410 Purification of bacterially expressed recombinant proteins was performed as previously described <sup>47, 49</sup>. Cleavage  
411 of the GST tag to induce cleaved fusion proteins was performed using PreScission protease (10 U/mg of fusion  
412 protein, GE Healthcare, Uppsala, Sweden) or thrombin protease (10 U/mg of fusion protein, Sigma-Aldrich,  
413 Germany). Importin  $\beta$ 1, p10/NTF2, and GDP-bound Ran were purified as previously described <sup>47, 49</sup>.

414  
415 ***Antibodies***

416 The following primary antibodies were used in this studies: Phospho-STAT1 (Tyr701) (#9167 [58D6], Cell  
417 Signaling Technology (CST) Inc., Danvers, MA, USA), STAT1 (#9172, CST), importin  $\alpha$ 1/KPNA2 (ab84440,

418 Abcam, Cambridge, MA, USA), HIF-1 $\alpha$  (ab51608 [EP1215Y], Abcam), NF- $\kappa$ B p65 (#8242 [D14E12], CST),  
419 importin  $\beta$ 1 (ab2811 [3E9], Abcam), CAS (ab96755, Abcam), Flag (M2 [F1804], Sigma-Aldrich), GFP (A-  
420 11122, rabbit, Thermo Fisher Scientific, Waltham, MA, USA), GFP (M048-3, mouse, MBL, Nagoya, Japan),  
421 NP (3A9, mouse mAb, Cell Engineering Co., Osaka, Japan), Actin (A2228, Sigma-Aldrich), and HA (MMS-  
422 101R, Biolegend, San Diego, CA, USA).

423 Horseradish peroxidase (HRP)-conjugated anti-rabbit (#111-035-003), anti-mouse (#115-035-003), or  
424 anti-rat (#112-035-003) secondary antibodies (Jackson ImmunoResearch Inc. West Grove, PA, USA) were used  
425 for western blotting. The secondary antibodies used for indirect immunofluorescence were as follows: Alexa  
426 Fluor Plus 488 conjugated anti-rabbit (A32731) or anti-mouse (A32723), and Alexa Fluor 594 conjugated anti-  
427 rabbit (A21207) or anti-mouse (A21203) (Invitrogen).

428

#### 429 *Cell culture and transfection*

430 HeLa cells or HEK293 cells were cultured in Dulbecco's modified Eagle's medium (DMEM; Invitrogen),  
431 containing 10% FBS (#10270, Gibco) at 37 °C in 5% CO<sub>2</sub>. The cells were plated onto 18 × 18 mm coverslips  
432 (Menzel-Glaser, Braunschweig, Germany) in 35-mm dishes for immunofluorescence or 60-mm dishes (IWAKI,  
433 Tokyo, Japan) for qRT-PCR 2 days prior to transfection. The transfections were performed using Lipofectamine  
434 2000 DNA Transfection Reagent (Thermo Fisher Scientific) or the TransIT-LT1 Transfection Reagent (Mirus,  
435 Madison, WI, USA) following manufacturer's instructions.

436

#### 437 *Indirect immunofluorescence*

438 HeLa cells were cultured on 18 × 18 mm coverslips (Matsunami, Osaka, Japan) in 35-mm dishes (IWAKI) and  
439 incubated for 48 h at 37 °C in 5% CO<sub>2</sub>. The reagents used for indirect immunofluorescence were as follows;  
440 IFN- $\beta$  and IFN- $\gamma$  (final conc. was 50 ng/mL for 30 min; Miltenyi Biotec, Bergisch Gladbach, Germany), TNF-  
441  $\alpha$  (final conc. was 20 ng/mL for 30 min; Miltenyi Biotec), hydrogen peroxide (H<sub>2</sub>O<sub>2</sub>, final conc. was 200  $\mu$ M

442 for 1 h), and Cobalt(II) chloride hexahydrate (CoCl<sub>2</sub>, final conc. was 200 μM for 5 h; C8661, Sigma-Aldrich).  
443 Following fixation with 3.7% formaldehyde in PBS for 15 min, cells were treated with 0.1% Triton X-100 in  
444 PBS for 5 min and then blocked in PBS containing 3% skim milk for 30 min. For the anti-Phospho-STAT1  
445 antibody (58D6, Rabbit mAb, #9167, CST), cells were permeabilized with 100% methanol at -20 °C for 20 min  
446 and then blocked in 3% skim milk in PBS. Cells were incubated with primary antibodies (1:200) with 3% skim  
447 milk in PBS overnight at 4 °C. The following day, the cells were incubated with the Alexa-Fluor-488 plus- or  
448 Alexa-Fluor-594-conjugated secondary antibodies (Invitrogen). Nuclei were counterstained with DAPI (1:5,000  
449 in PBS, Dojindo Laboratories, Kumamoto, Japan) for 20 min at 25 °C. The coverslips with fixed cells were  
450 mounted on glass slides using ProLong Gold Antifade (#36930, Invitrogen). Cells were examined under a  
451 confocal microscope (Leica TCS SP8 II; Leica Microsystems, Wetzlar, Germany).

452

#### 453 ***Western blotting***

454 Western blotting was performed as previously described<sup>50</sup>. The membranes were incubated with primary  
455 antibodies (dilutions ranging from 1:1000 to 1:2000) diluted in Can Get Signal Immunoreaction Enhancer  
456 Solution 1 (TOYOBO, Osaka, Japan) overnight at 4 °C. The used HRP-conjugated secondary antibodies  
457 (dilutions ranging from 1:2000 for mammalian expression to 1:10,000 for bacterially purified recombinant  
458 proteins) were diluted in Can Get Signal Immunoreaction Enhancer Solution 2 (TOYOBO) at 25 °C for 1 h.

459

#### 460 ***RNA purification and quantitative RT-PCR (qRT-PCR)***

461 For IP-10, total RNA was isolated using ReliaPrep™ RNA Tissue Miniprep System (Promega, Madison, WI,  
462 USA) according to the manufacturer's instructions. One microgram of total RNA and the PrimeScript RT  
463 reagent kit (Takara Bio.) were used to perform the first-strand cDNA synthesis. The PCR reaction was  
464 performed as previously described<sup>50</sup>. The PCR primers including those of β-actin are described in Table S2.

465 For detection of N2 in SARS-CoV-2, total RNA of Huh7-ACE2 or lung homogenates were isolated  
466 using ISOGENE II (Nippon Gene, Toyama, Japan). Real-time RT-PCR was performed with the Power SYBR  
467 Green RNA-to-CT 1-Step Kit (Applied Biosystems, Foster City, CA, USA) using an AriaMx Real-Time PCR  
468 system (Agilent, Santa Clara, CA, USA). The relative quantification of the target mRNA levels was performed  
469 using the  $2^{-\Delta\Delta CT}$  method.  $\beta$ -actin was used as the housekeeping gene. The primers used are described in Table  
470 S2.

471

#### 472 *Quantitative RT-PCR of viral RNA in the supernatant*

473 The amount of RNA copies in the culture medium was determined using a qRT-PCR assay as previously  
474 described with slight modifications <sup>51</sup>. Briefly, 5  $\mu$ L of culture supernatants were mixed with 5  $\mu$ L of 2 $\times$  RNA  
475 lysis buffer (2% Triton X-100, 50 mM KCl, 100 mM Tris-HCl [pH 7.4], 40% glycerol, 0.4 U/ $\mu$ L of Superase•IN  
476 [Thermo Fisher Scientific]) and incubated at 25 °C for 10 min. Next, 90  $\mu$ L of RNase free water were added to  
477 the mix. A volume of 2.5  $\mu$ L of the diluted sample was added to 17.5  $\mu$ L of reaction mix. Real-time RT-PCR  
478 was performed using the Power SYBR Green RNA-to-CT 1-Step Kit (Applied Biosystems) and an AriaMx  
479 Real-Time PCR system (Agilent).

480

#### 481 *Plaque formation assay*

482 Vero-TMPRSS2 were seeded into 24-well plates (80,000 cells/well) at 37 °C in 5% CO<sub>2</sub> for overnight. The  
483 supernatants were serially diluted using inoculated medium and incubated for 2 h. Next, the culture medium  
484 was removed, fresh medium containing 1% methylcellulose (1.5 mL) was added, and the cells were cultured  
485 for 3 more days. Lastly, the cells were fixed with 4% paraformaldehyde in PBS (Nacalai Tesque, Kyoto, Japan)  
486 and the plaques were visualized by using a Giemsa's azur-eosin-methylene blue solution (#109204, Merck  
487 Millipore, Darmstadt, Germany).

488

489 ***Syrian hamster model of SARS-CoV-2 infection***

490 Syrian hamsters were anaesthetized with isoflurane and challenged with  $1.0 \times 10^6$  PFU (in 60  $\mu$ L) SARS-CoV-  
491 2 via intranasal routes. The body weight was monitored daily for 5 days. Five days post infection, all animals  
492 were euthanized, and the lungs were collected for histopathological examinations and qRT-PCR.

493

494 ***Immunohistochemistry***

495 Lung tissues were fixed with 10% neutral buffered formalin and embedded in paraffin. For  
496 immunohistochemical staining, 2  $\mu$ m thick sections were immersed in citrate buffer (pH 6.0) and heated for 20  
497 min with a pressure cooker. Endogenous peroxidase was inactivated by immersion in 3% H<sub>2</sub>O<sub>2</sub> in PBS. After  
498 treatment with 5% skim milk in PBS for 30 min at 25 °C, the sections were incubated with mouse anti-NP  
499 antibody (1:500, clone 3A9). EnVision<sup>+</sup> system-HRP-labeled polymer anti-mouse secondary antibody (Dako,  
500 Carpinteria, CA, USA) was used. Lastly, the sections were counterstained with hematoxylin and the positive  
501 signals were visualized using the peroxidase–diaminobenzidine reaction.

502

503 ***KPNA2 knockout***

504 For the single-guide RNA (sgRNA) targeting *KPNA2*, the targeting sequences were designed using three  
505 different sequences for each gene as previously described<sup>52</sup>. The targeting sequences were synthesized using  
506 DNA oligos (Eurofins Genomics, Tokyo, Japan), and cloned into the lentiCRISPR v2 (Addgene, #52961)  
507 digested by BmsBI (New England Biolab, MA, USA). The target sequences for *KPNA2* were described in Table  
508 S3. Lentiviruses expressing three types of target sequences per gene were mixed, introduced into the Huh7 cells  
509 expressing the ACE2 receptor (Huh7-ACE2), and maintained in a culture medium supplemented with 1  $\mu$ g/mL  
510 puromycin for 3 weeks. For viral infection, sgControl (sgCtl) or sgKPNA2 Huh7-ACE2 cells were seeded into  
511 24-well plates and incubated at 37 °C for 24 h. The different SARS-CoV-2 strains were used to infect the cells



512 (MOI 0.1) and supernatants were collected at 0, 6, 12, and 24 h. The intracellular viral RNA was quantified  
513 using qRT-PCR while the viral titers were quantified using the plaque forming assay.

514

#### 515 ***Construction of SARS-CoV-2 replicon DNA.***

516 SARS-CoV-2 replicon vector, pBAC-SCoV2-Rep, was generated using the CPER reaction as previously  
517 described<sup>53</sup>, with some modifications. Briefly, seven DNA fragments covering the SARS-CoV-2 genome  
518 (excluding the region spanning from S gene to ORF8 gene) were amplified using PCR, and subcloned into a  
519 pCR-Blunt vector (Invitrogen). The DNA fragments containing cytomegalovirus (CMV) promoter, a 25  
520 nucleotide synthetic poly(A), a hepatitis delta ribozyme as well as a bovine growth hormone (BGH) termination,  
521 and a polyadenylation sequences (the lightly shaded region in Fig. 3D) were amplified using a conventional  
522 overlap extension PCR, and subcloned into the NotI sites of pSMART BAC vector (Lucigen, Middelton, WI,  
523 USA). The luciferase reporter vector pGL4 was used as the template for PCR amplification of Renilla luciferase  
524 gene. For CPER reaction, nine DNA fragments that contain approximately 40-bp overlapping ends for two  
525 neighboring fragments were amplified by PCR using the aforementioned plasmids. Next, the PCR fragments  
526 were mixed equimolarly (0.1 pmol each) and subjected to CPER reaction using the PrimeSTAR GXL DNA  
527 polymerase (Takara Bio.). The CPER product was extracted using phenol-chloroform, followed by ethanol  
528 precipitation, resolved in TE buffer, and transformed into the BAC-Optimized Replicator v2.0 Electrocompetent  
529 Cells (Lucigen). The replicon vector was maxiprepred using a NucleoBond Xtra BAC kit (Takara Bio.).

530

#### 531 ***Generation of SARS-CoV-2 recombinant virus***

532 SARS-CoV-2 recombinants were generated by CPER reaction as previously described<sup>54</sup> with some  
533 modifications. Briefly, 14 SARS-CoV-2 (2019-nCoV/Japan/TY/WK-521/2020) cDNA fragments (#1-#13)  
534 were amplified using PCR and subcloned into a pBlueScript KS(+) vector. The primers used are described in  
535 Table S4. The DNA fragments containing CMV promoter, a 25-nucleotide synthetic poly(A), hepatitis delta

536 ribozyme and BGH termination and, polyadenylation sequences (#14) were synthesized by Integrated DNA  
537 Technologies (Coralville, IA, USA), and subcloned into a pBlueScript KS(+) vector. To generate a reporter  
538 SARS-CoV-2 virus, we inserted a NanoLuc (NLuc) gene and 2A peptide into the ORF6 sequence of fragment  
539 #12 (SARS-CoV-2/NLuc2AORF6). To generate an ORF6 deficient SARS-CoV-2 virus, ORF6 gene was  
540 replaced with an NLuc gene (SARS-CoV-2/ $\Delta$ ORF6). For CPER reaction, 14 DNA fragments that contain  
541 approximately 40- to 60-bp overlapping ends for two neighboring fragments were amplified using PCR from  
542 the subcloned plasmids. Next, the PCR fragments were mixed equimolarly (0.1 pmol each) and subjected to  
543 CPER reaction using the PrimeSTAR GXL DNA polymerase (Takara Bio.). The cycling condition used  
544 included an initial 2 min of denaturation at 98 °C; 35 cycles of 10 s at 98 °C, 15 s at 55 °C, and 15 min at 68 °C;  
545 and a final elongation period of 15 min at 68 °C. The half of CPER product was transfected into IFNAR1-  
546 deficient HEK293 cells TransIT-LT1 transfection reagents (Mirus), according to the manufacturer's instructions.  
547 ACE2 and TMPRSS2 receptors were induced in HEK293-3P6C33 cells using tetracycline. At 24 h post-  
548 transfection, the culture medium were replaced with DMEM containing 2% FBS and doxycycline hydrochloride  
549 (1  $\mu$ g/ml). At 7-10 days post transfection, the culture medium containing progeny viruses (P0 virus) were  
550 passaged and amplified in VeroE6/TMPRSS2 cells.

551

### 552 *Luciferase assay*

553 Huh7 cells were seeded into a 24-well plate and incubated at 37 °C for 24 h. The cells were transfected with  
554 pISRE-TA-Luc, pRL-TK (Promega), and pCAG AcGFP-HA or pCAG AcGFP-ORF6-HA using TransIT-LT1  
555 reagents (Mirus) according to the manufacturer's instructions. The cells were incubated for 24 h after  
556 transfection and treated with IFN- $\gamma$  (50 ng/mL) for 12 h.

557 VeroE6/TMPRSS2 cells were seeded into a 24-well plate and incubated at 37 °C for 24 h. The cells  
558 were transfected with pISRE-TA-Luc and pRL-TK (Promega). After 24 h, the cells were infected with SARS-

559 CoV-2 and treated with IFN- $\gamma$  (50 ng/mL) for 12 h. The luciferase activity was detected using the Dual-  
560 Luciferase Reporter Assay System (Promega) according to the manufacturer's instructions.

561

### 562 *Semi-intact nuclear transport assay*

563 A digitonin-permeabilized *in vitro* nuclear transport assay was performed as previously described<sup>47</sup>. The NLS  
564 substrate GST-NLS-GFP was used 4 pmoL in 10  $\mu$ L of reaction mixture, and the competitive substrate AcGFP-  
565 ORF6 was added to the assay with 20 pmoL, 40 pmoL, and 80 pmoL which represented 5 $\times$ , 10 $\times$ , or 20 $\times$  the  
566 NLS-substrate dosage, respectively.

567

### 568 *The analyses of GTEx datasets*

569 We obtained publicly available data regarding the expression levels of *KPNA* genes, sex, age category (20-29,  
570 30-39, 40-49, 50-59, 60-69, 70-79), and genotype principal components (PCs) of 49 tissues from 838 post-  
571 mortem donors from GTEx v8 website (<https://www.gtexportal.org/home/>). These samples were used for  
572 expression quantitative trait locus (eQTL) analysis, and the expression levels were already normalized (see  
573 "3.4.2 Gene expression quantification" in the supplementary materials<sup>55</sup>). From the genotype PC1 and PC2, we  
574 inferred the ancestry of the individuals (European (EUR), African (AFR), Asian, and others) by comparing with  
575 plots showing those PCs and reported the different races in the GTEx v8 paper<sup>56</sup> (Fig. S4). We performed the  
576 Jonckheere-Terpstra test (the number of permutation iterations was 10<sup>4</sup>) to analyze the trends between age  
577 category and *KPNA2* expression levels using R package *clinfun* v1.0.15, and the Welch t-test for quantifying  
578 the differences in expression levels between males and females.

579

### 580 *Statistical Analysis*

581 Data were analyzed with Prism 7.0 software (GraphPad Software, La Jolla, CA), and expressed as the  
582 mean  $\pm$  standard deviation (SD). Statistical significance was evaluated by one-way ANOVA or two-way

583 ANOVA for comparison of multiple groups and the Student t test for two groups, \*P < 0.05, \*\*P < 0.01, \*\*\*P  
584 < 0.001.

585 **FIGURE LEGENDS**

586 **Figure 1. Mutated viruses reveal the virulence of ORF6 in SARS-CoV-2 replication**

587 **A.** Identification of ORF6 in different SARS-CoV-2 strains by a newly established antibody. VeroE6/TMPRSS2  
588 cells were infected with several SARS-CoV-2 strains, and cell lysates were collected for detection of the ORF6  
589 protein using western blotting. NIID: 2019-nCoV/Japan/TY/WK-521/2020 strain was isolated at the National  
590 Institute of Infectious Diseases. The nucleoprotein (NP) and Actin were used as an infection control and internal  
591 control, respectively. **B.** Indirect immunofluorescence of ORF6 in VeroE6/TMPRSS2 cells infected with or  
592 without (sham) SARS-CoV-2 from NIID. The squares with a red line show a magnified margin image. Scale  
593 bars: 20  $\mu$ m. **C.** VeroE6/TMPRSS2 cells were infected with SARS-CoV-2 WT (Nluc-2A-ORF6) or  $\Delta$ ORF6  
594 and the cell lysates were collected at 24 h post infection. Cell lysates were subjected to western blotting, and  
595 then detected the proteins using specific antibodies for ORF6, NP, or Actin. **D.** Huh7-ACE2 cells were infected  
596 with SARS-CoV-2 WT (Nluc-2A-ORF6) or  $\Delta$ ORF6 and supernatants were collected at 24 h post infection.  
597 Viral RNA in the supernatants was quantified using qRT-PCR. \*\*\* $P < 0.001$ , two-tailed Student's t-test. **E.**  
598 Percent body weight changes were calculated for all hamsters infected with SARS-CoV-2 WT or  $\Delta$ ORF6. Data  
599 are mean  $\pm$  SD from four independent animals. **F.** Viral RNA in lung homogenates from hamsters was quantified  
600 using qRT-PCR. \* $P < 0.05$ , two-tailed Student's t-test. **G.** Immunohistochemistry of SARS-CoV-2 antigen (NP  
601 protein) in lung lobes of hamster infected with SARS-CoV-2 WT or  $\Delta$ ORF6, respectively. Scale bars: 100  $\mu$ m.

602  
603 **Figure 2. Inhibition of nuclear localization of PY-STAT1 by ORF6**

604 **A-B.** Immunofluorescence of phosphorylated STAT1 (PY-STAT1) in HeLa cells transfected with AcGFP or  
605 AcGFP-ORF6 following INF- $\beta$  (**A**) or IFN- $\gamma$  (**B**). AcGFP (green) and PY-STAT1 (red) were identified using  
606 specific antibodies. DAPI staining (blue) was used for DNA staining. Scale bars: 30  $\mu$ m. **C.** The graph represents  
607 the relative fluorescence values of PY-STAT1 in the nucleus compared to those of the whole cells (shown in  
608 **B**). Signal intensities of total 100 different nuclei from two independent experiments. \*\*\* $P < 0.001$ , two-tailed

609 Student's t-test. **D.** qRT-PCR analysis of *IP-10* mRNA in AcGFP and AcGFP-ORF6-transfected HeLa cells at  
610 the described time points (n = 4 each). \*P < 0.05, \*\*\*P < 0.001, two-way ANOVA. **E.** Relative luciferase values  
611 of ISRE-TA-Luc in AcGFP and AcGFP-ORF6-transfected Huh7 cells upon IFN- $\gamma$  stimulation. \*\*\*P < 0.001,  
612 one-way ANOVA. **F.** Relative luciferase values in VeroE6/TMPRSS2 cells infected with SARS-CoV-2 (NIID  
613 strain). \*P < 0.05, one-way ANOVA.

614

### 615 **Figure 3. The C-terminal region of ORF6 contributes to viral RNA replication**

616 **A.** Schematic representation of ORF6 wild type (WT) and its alanine substitution mutations within the C-  
617 terminus. ORF6-M0: wild type ORF6; ORF6-M1: ORF6 with amino acids 49-52 substituted for alanine; ORF6-  
618 M2: ORF6 with amino acids 53-55 substituted for alanine; ORF6-M3: ORF6 with amino acids 56-61 substituted  
619 for alanine. **B.** Immunofluorescence of PY-STAT1 in HeLa cells transfected with the AcGFP-ORF6 mutants  
620 following IFN- $\gamma$  stimulation. DAPI was used to stain the DNA. Scale bars: 30  $\mu$ m. **C.** The graph represents the  
621 relative fluorescence values in the nucleus compared to those of the whole cells in **B.** Signal intensities of total  
622 50 nuclei from two independent experiments were measured. \*\*\*P < 0.001, one-way ANOVA. **D.** Schematic  
623 representation of SARS-CoV-2 replicon DNA, pBAC-SCoV2-Rep. The genetic structure of the SARS-CoV-2  
624 replicon is shown at the top of the panel. The dark shaded box indicates the core sequence of transcription  
625 regulating sequence. CMV, cytomegalovirus promoter; RL, Renilla luciferase gene; pA, a synthetic poly(A)  
626 tail; Rz, hepatitis delta virus ribozyme; BGH, bovine growth hormone polyadenylation sequence. **E.** Relative  
627 luciferase values for each ORF6 mutant in replicon (n=3). \*\*P < 0.01, \*\*\*P < 0.001, one-way ANOVA.

628

### 629 **Figure 4. ORF6 directly binds to STAT1**

630 **A.** Immunofluorescence of Flag-STAT1 in HeLa cells transfected with AcGFP, AcGFP-ORF6 WT or AcGFP-  
631 ORF6 $\Delta$ 9 (anti-GFP or anti-Flag antibodies were used). DAPI was used to stain the DNA. Scale bars: 30  $\mu$ m. **B.**  
632 The graph represents the relative fluorescence values of Flag-STAT1 in the nucleus compared to those of the

633 whole cells in **A**. Signal intensities from total 45 nuclei from two independent experiments. \*\*\* $P < 0.001$ , one-  
634 way ANOVA. **C**. Immunofluorescence of Flag-STAT1 in HeLa cells transfected with AcGFP, AcGFP-ORF6  
635 WT or AcGFP-ORF6 $\Delta$ 9 following IFN- $\gamma$  stimulation. Anti-GFP or anti-Flag antibodies were used for detection.  
636 DAPI was used to stain the DNA. Scale bars: 30  $\mu$ m. **D**. The graph represents the relative fluorescence values  
637 of Flag-STAT1 in the nucleus compared to those of the whole cells in **C**. Signal intensities from total 45 nuclei  
638 from two independent experiments were measured. \*\*\* $P < 0.001$ , one-way ANOVA. **E**. Immunoprecipitation  
639 of ORF6 was used to detect the binding with STAT1. HEK293 cells were transiently transfected with HA fused  
640 AcGFP-ORF6 (HA-ORF6) and Flag-STAT1 for 24 h. Cell lysates were subjected to immunoprecipitation using  
641 an anti-Flag antibody. Following the immunoprecipitation, the samples were western blotted with the anti-Flag  
642 antibody or the anti-HA antibody, respectively. **F**. GST-GFP and GST-GFP-ORF6 immobilized on glutathione  
643 Sepharose beads were incubated with the bacterially purified STAT1 recombinant protein for 1 h. The bottom  
644 panel represents the proteins bound to the beads and stained with Coomassie Brilliant Blue (CBB). Input is  
645 1/10th of the amount of STAT1 used for the reaction. **G**. GST-GFP or GST-GFP fused with the C-terminal  
646 peptide of ORF6 wild type (49-61 amino acids; GST-M0-GFP) immobilized on glutathione Sepharose beads  
647 was incubated with the STAT1 recombinant protein for 1 h. The bottom panel represents the proteins bound to  
648 the beads and stained with CBB. Input is 1/10th of the amount of STAT1 used for the reaction.

649  
650 **Figure 5. ORF6 affects the subcellular localization of importin  $\alpha$  proteins**

651 **A-B**. Immunofluorescence of Flag-importin  $\alpha$ 1 (Flag-Imp $\alpha$ 1) and Flag-importin  $\alpha$ 5 (Flag-Imp $\alpha$ 5) in HeLa cells  
652 transfected with AcGFP or AcGFP-ORF6. Anti-GFP or anti-Flag antibodies were used for detection. DAPI was  
653 used to stain the DNA. Scale bars: 30  $\mu$ m. **C**. The graph represents the relative fluorescence values of the nucleus  
654 compared to those of the whole cells in **A** and **B**. Signal intensities of total 50 nuclei from two independent  
655 experiments were measured. \*\*\* $P < 0.001$ , two-tailed Student's t-test. **D**. GST-GFP and GST-GFP-ORF6 were  
656 immobilized on glutathione Sepharose beads and incubated with bacterially purified Flag-importin  $\alpha$ 1 (Flag-

657 Imp $\alpha$ 1) or Flag-importin  $\alpha$ 5 (Flag-Imp $\alpha$ 5) for 1 h. The importin  $\alpha$  proteins were detected using an anti-Flag  
658 antibody. The bottom panel represents the proteins bound to the beads and stained with CBB. Inputs are 1/30th  
659 of the amount of each importin  $\alpha$  that was used for the reaction. **E.** Immunofluorescence of Flag-importin  $\alpha$ 1  
660 (Flag-Imp $\alpha$ 1) in HeLa cells transfected with AcGFP-ORF6 with or without hydrogen peroxide (200  $\mu$ M H<sub>2</sub>O<sub>2</sub>)  
661 for 30 min. Anti-GFP or anti-Flag antibodies were used for detection. DAPI was used to stain the DNA. Scale  
662 bars: 30  $\mu$ m. **F.** The graph represents the relative fluorescence values of the nucleus compared to those of the  
663 whole cells in **E.** Signal intensities of total 80 nuclei from two independent experiments were measured. \*\*\*P  
664 < 0.001, two-tailed Student's t-test.

665

666 **Figure 6. ORF6 negatively regulates the importin  $\alpha$ / $\beta$ 1 pathway**

667 **A.** Subcellular localization of mCherry-NLS in HeLa cells transfected with AcGFP or AcGFP-ORF6. DAPI  
668 was used to stain the DNA. Scale bars: 30  $\mu$ m. **B.** The graph represents the relative fluorescence values of the  
669 nucleus compared to those of the whole cells in **A.** Signal intensities of total 50 nuclei from two independent  
670 experiments were measured. \*\*\*P < 0.001, two-tailed Student's t-test. **C.** GST-GFP, GST-GFP-ORF6 or GST-  
671 NLS-GFP were immobilized on glutathione Sepharose beads and incubated with importin  $\alpha$ 1 (Imp $\alpha$ 1) for 1 h.  
672 The bottom panel represents the proteins bound to the beads and stained with CBB. Inputs are 1/10th of the  
673 amount of each importin  $\alpha$  that was used for the reaction. **D.** An *in vitro* semi-intact nuclear transport assay was  
674 performed to measure the nuclear import of GST-NLS-mRFP in the presence of AcGFP-ORF6. Digitonin-  
675 permeabilized HeLa cells were incubated with GST-NLS-mRFP, importin  $\alpha$ 1, importin  $\beta$ 1, RanGDP, p10/NTF2,  
676 GTP, and ATP regeneration system. The reaction mixture was added 5 $\times$ , 10 $\times$ , or 20 $\times$  concentration of AcGFP-  
677 ORF6 compared to that of the NLS-substrate. After incubation for 30 min, the mRFP signals were detected  
678 using a fluorescence microscope. DAPI was used to stain the DNA. Scale bars: 30  $\mu$ m. **E.** The graph represents  
679 the nuclear fluorescence values of GST-NLS-mRFP in **D.** Signal intensities of total 100 nuclei were measured  
680 and the statistically analyzed using a one-way ANOVA (\*\*\*P < 0.001). **F.** Immunofluorescence of HIF-1 $\alpha$  in



681 HeLa cells transfected with AcGFP or AcGFP-ORF6 following CoCl<sub>2</sub> treatment. Anti-GFP or anti-Flag  
682 antibodies were used for detection. DAPI was used to stain the DNA. Scale bars: 30 μm. **G.** The graph represents  
683 the relative fluorescence values of the nucleus compared to those of the entire cells in **F.** Signal intensities of  
684 total 50 nuclei from two independent experiments were measured. \*\*\*P < 0.001, two-tailed Student's t-test. **H.**  
685 Immunofluorescence of NF-κB p65 in HeLa cells transfected with AcGFP or AcGFP-ORF6 following TNF-α  
686 stimulation. Anti-GFP or anti-Flag antibodies were used for detection. DAPI was used to stain the DNA. Scale  
687 bars: 30 μm. **I.** The graph represents the relative fluorescence values of the nucleus compared to whole cells in  
688 **H.** Signal intensities of total 50 nuclei from two independent experiments were measured. \*\*\*P < 0.001, two-  
689 tailed Student's t-test. **J-K.** Huh7 cells expressing the ACE2 receptor (Huh7-ACE2) introduced with sgControl  
690 (sgCtl) or sgKPNA2 were infected with SARS-CoV-2 and supernatants were collected at 0, 6, 12, and 24 h.  
691 Intracellular viral RNA was quantified using qRT-PCR (**J**) while the viral titers (**K**) were quantified using plaque  
692 forming assay. Statistical significance was determined using a two-way ANOVA (\*\*\*P < 0.001).

693  
694 **Figure 7. Expression levels of KPNA2 gene for different age categories.**

695 GTEEx donors whose estimated ancestry was EUR (n = 436 for lung tissues in **A** and **B**, and n = 558 for whole  
696 blood in **C** and **D**) were used. P-values for the trends between KPNA2 expression levels and age categories were  
697 obtained using the two-sided Jonckheere-Terpstra test. The box represented the first and third quartiles and the  
698 center line represented the median. The upper whisker extended from the hinge to the highest value that is within  
699 the 1.5 × IQR of the hinge, the lower whisker extended from the hinge to the lowest value within the 1.5 × IQR  
700 of the hinge, and the data beyond the end of the whiskers were plotted as points. F, female; M, male; IQR,  
701 interquartile range.

702 **ACKNOWLEDGMENTS**

703 This work was funded by the Japan Agency for Medical Research and Development (AMED) [grant numbers  
704 20fk0108263h0001 and 20fk0108296s0101] to YM, TS, TT, and TO.

705

706 **AUTHOR CONTRIBUTION:**

707 Conceptualization: Y.M. and T.O.

708 Methodology: Y.M., T.S., T.T., Y.S., M.K., T.T., Y.K., Y.Y., and T.O.

709 Investigation: Y.M., Y.I., T.S., T.T., Y.S., M.K., C.H., C.W., M.O., and T.O.

710 Resources: Y.M., T.S., T.T., Y.S., K.M., T.T., Y.K., T.O., and M.O.

711 Writing – Original Draft: Y.M., Y.I., T.S., T.T., Y.S., M.K., T.T., Y.K., Y.Y., T.O., and M.O.

712 Writing – Review & Editing: Y.M., Y.I., T.S., T.T., Y.S., M.K., C.H., C.W., M.O., K.M., T.T., Y.K., Y.Y.,  
713 T.O., and M.O.

714 Funding Acquisition: Y.M., T.S., T.T., and T.O.

715 Supervision: Y.M. and T.O.

716

717 **COMPETING INTEREST STATEMENT:**

718 The authors declare no competing interests.

719 **REFERENCES**

720

- 721 1. Zhou P, *et al.* A pneumonia outbreak associated with a new coronavirus of probable bat origin. *Nature*  
722 **579**, 270-273 (2020).  
723
- 724 2. Chan JF, *et al.* Genomic characterization of the 2019 novel human-pathogenic coronavirus isolated  
725 from a patient with atypical pneumonia after visiting Wuhan. *Emerging microbes & infections* **9**, 221-  
726 236 (2020).  
727
- 728 3. Lu R, *et al.* Genomic characterisation and epidemiology of 2019 novel coronavirus: implications for  
729 virus origins and receptor binding. *Lancet* **395**, 565-574 (2020).  
730
- 731 4. Kim D, Lee JY, Yang JS, Kim JW, Kim VN, Chang H. The Architecture of SARS-CoV-2 Transcriptome.  
732 *Cell* **181**, 914-921.e910 (2020).  
733
- 734 5. Li X, Geng M, Peng Y, Meng L, Lu S. Molecular immune pathogenesis and diagnosis of COVID-19.  
735 *Journal of pharmaceutical analysis* **10**, 102-108 (2020).  
736
- 737 6. Yuen CK, *et al.* SARS-CoV-2 nsp13, nsp14, nsp15 and orf6 function as potent interferon antagonists.  
738 *Emerging microbes & infections* **9**, 1418-1428 (2020).  
739
- 740 7. Frieman M, Yount B, Heise M, Koepcke-Bromberg SA, Palese P, Baric RS. Severe acute respiratory  
741 syndrome coronavirus ORF6 antagonizes STAT1 function by sequestering nuclear import factors on the  
742 rough endoplasmic reticulum/Golgi membrane. *Journal of virology* **81**, 9812-9824 (2007).  
743
- 744 8. Lei X, *et al.* Activation and evasion of type I interferon responses by SARS-CoV-2. *Nature*  
745 *communications* **11**, 3810 (2020).  
746
- 747 9. Miorin L, *et al.* SARS-CoV-2 Orf6 hijacks Nup98 to block STAT nuclear import and antagonize  
748 interferon signaling. *Proc Natl Acad Sci U S A* **117**, 28344-28354 (2020).  
749
- 750 10. Xia H, *et al.* Evasion of Type I Interferon by SARS-CoV-2. *Cell reports* **33**, 108234 (2020).  
751
- 752 11. Platanias LC. Mechanisms of type-I- and type-II-interferon-mediated signalling. *Nature reviews*  
753 *Immunology* **5**, 375-386 (2005).  
754

- 755 12. Michalska A, Blaszczyk K, Wesoly J, Bluysen HAR. A Positive Feedback Amplifier Circuit That  
756 Regulates Interferon (IFN)-Stimulated Gene Expression and Controls Type I and Type II IFN Responses.  
757 *Frontiers in immunology* **9**, 1135 (2018).  
758
- 759 13. Li JY, *et al.* The ORF6, ORF8 and nucleocapsid proteins of SARS-CoV-2 inhibit type I interferon  
760 signaling pathway. *Virus research* **286**, 198074 (2020).  
761
- 762 14. Walde S, Kehlenbach RH. The Part and the Whole: functions of nucleoporins in nucleocytoplasmic  
763 transport. *Trends Cell Biol* **20**, 461-469 (2010).  
764
- 765 15. D'Angelo MA, Hetzer MW. Structure, dynamics and function of nuclear pore complexes. *Trends Cell*  
766 *Biol* **18**, 456-466 (2008).  
767
- 768 16. Chook YM, Suel KE. Nuclear import by karyopherin-betas: recognition and inhibition. *Biochim*  
769 *Biophys Acta* **1813**, 1593-1606 (2011).  
770
- 771 17. Pumroy RA, Cingolani G. Diversification of importin- $\alpha$  isoforms in cellular trafficking and disease  
772 states. *Biochem J* **466**, 13-28 (2015).  
773
- 774 18. Madrid AS, Weis K. Nuclear transport is becoming crystal clear. *Chromosoma* **115**, 98-109 (2006).  
775
- 776 19. Marfori M, *et al.* Molecular basis for specificity of nuclear import and prediction of nuclear localization.  
777 *Biochim Biophys Acta* **1813**, 1562-1577 (2011).  
778
- 779 20. Miyamoto Y, Boag PR, Hime GR, Loveland KL. Regulated nucleocytoplasmic transport during  
780 gametogenesis. *Biochim Biophys Acta* **1819**, 616-630 (2012).  
781
- 782 21. Miyamoto Y, Yamada K, Yoneda Y. Importin  $\alpha$ : a key molecule in nuclear transport and non-transport  
783 functions. *Journal of biochemistry* **160**, 69-75 (2016).  
784
- 785 22. Goldfarb DS, Corbett AH, Mason DA, Harreman MT, Adam SA. Importin  $\alpha$ : a multipurpose nuclear-  
786 transport receptor. *Trends Cell Biol* **14**, 505-514 (2004).  
787
- 788 23. Mason DA, Stage DE, Goldfarb DS. Evolution of the metazoan-specific importin  $\alpha$  gene family. *J Mol*  
789 *Evol* **68**, 351-365 (2009).  
790
- 791 24. Sekimoto T, Imamoto N, Nakajima K, Hirano T, Yoneda Y. Extracellular signal-dependent nuclear

- 792 import of Stat1 is mediated by nuclear pore-targeting complex formation with NPI-1, but not Rch1.  
793 *EMBO J* **16**, 7067-7077 (1997).
- 794
- 795 25. McBride KM, Banninger G, McDonald C, Reich NC. Regulated nuclear import of the STAT1  
796 transcription factor by direct binding of importin- $\alpha$ . *EMBO J* **21**, 1754-1763 (2002).
- 797
- 798 26. Melen K, Fagerlund R, Franke J, Kohler M, Kinnunen L, Julkunen I. Importin  $\alpha$  nuclear localization  
799 signal binding sites for STAT1, STAT2, and influenza A virus nucleoprotein. *J Biol Chem* **278**, 28193-  
800 28200 (2003).
- 801
- 802 27. Nardozzi J, Wenta N, Yasuhara N, Vinkemeier U, Cingolani G. Molecular basis for the recognition of  
803 phosphorylated STAT1 by importin  $\alpha$ 5. *Journal of molecular biology* **402**, 83-100 (2010).
- 804
- 805 28. Gordon DE, *et al.* A SARS-CoV-2 protein interaction map reveals targets for drug repurposing. *Nature*  
806 **583**, 459-468 (2020).
- 807
- 808 29. Kumar P, *et al.* The nonstructural protein 8 (nsp8) of the SARS coronavirus interacts with its ORF6  
809 accessory protein. *Virology* **366**, 293-303 (2007).
- 810
- 811 30. Abe T, *et al.* CD44 participates in IP-10 induction in cells in which hepatitis C virus RNA is replicating,  
812 through an interaction with Toll-like receptor 2 and hyaluronan. *Journal of virology* **86**, 6159-6170  
813 (2012).
- 814
- 815 31. Riojas MA, *et al.* A Rare Deletion in SARS-CoV-2 ORF6 Dramatically Alters the Predicted Three-  
816 Dimensional Structure of the Resultant Protein. *bioRxiv : the preprint server for biology*,  
817 2020.2006.2009.134460 (2020).
- 818
- 819 32. Addetia A, *et al.* SARS-CoV-2 ORF6 disrupts nucleocytoplasmic transport through interactions with  
820 Rae1 and Nup98. *bioRxiv : the preprint server for biology*, 2020.2008.2003.234559 (2020).
- 821
- 822 33. Miyamoto Y, *et al.* Cellular stresses induce the nuclear accumulation of importin  $\alpha$  and cause a  
823 conventional nuclear import block. *J Cell Biol* **165**, 617-623 (2004).
- 824
- 825 34. Kodiha M, Chu A, Matusiewicz N, Stochaj U. Multiple mechanisms promote the inhibition of classical  
826 nuclear import upon exposure to severe oxidative stress. *Cell Death Differ* **11**, 862-874 (2004).
- 827
- 828 35. Fagerlund R, Kinnunen L, Kohler M, Julkunen I, Melen K. NF- $\kappa$ B is transported into the nucleus by

- 829 importin  $\alpha 3$  and importin  $\alpha 4$ . *J Biol Chem* **280**, 15942-15951 (2005).  
830
- 831 36. Depping R, *et al.* Nuclear translocation of hypoxia-inducible factors (HIFs): involvement of the  
832 classical importin alpha/beta pathway. *Biochim Biophys Acta* **1783**, 394-404 (2008).  
833
- 834 37. Liang P, *et al.* KPNB1, XPO7 and IPO8 mediate the translocation of NF- $\kappa$ B/p65 into the nucleus. *Traffic*  
835 **14**, 1132-1143 (2013).  
836
- 837 38. Meyer T, Vinkemeier U. Nucleocytoplasmic shuttling of STAT transcription factors. *Eur J Biochem* **271**,  
838 4606-4612 (2004).  
839
- 840 39. Cheon H, Stark GR. Unphosphorylated STAT1 prolongs the expression of interferon-induced immune  
841 regulatory genes. *Proceedings of the National Academy of Sciences* **106**, 9373-9378 (2009).  
842
- 843 40. Cheon H, *et al.* IFN $\beta$ -dependent increases in STAT1, STAT2, and IRF9 mediate resistance to viruses  
844 and DNA damage. *Embo j* **32**, 2751-2763 (2013).  
845
- 846 41. Kato K, *et al.* Overexpression of SARS-CoV-2 protein ORF6 dislocates RAE1 and NUP98 from the  
847 nuclear pore complex. *Biochem Biophys Res Commun* **536**, 59-66 (2020).  
848
- 849 42. Nagy Á, Pongor S, Györffy B. Different mutations in SARS-CoV-2 associate with severe and mild  
850 outcome. *Int J Antimicrob Agents*, 106272 (2020).  
851
- 852 43. Serebrovska ZO, Chong EY, Serebrovska TV, Tumanovska LV, Xi L. Hypoxia, HIF-1 $\alpha$ , and COVID-  
853 19: from pathogenic factors to potential therapeutic targets. *Acta Pharmacol Sin* **41**, 1539-1546 (2020).  
854
- 855 44. Liu PJ, Balfe P, McKeating JA, Schilling M. Oxygen Sensing and Viral Replication: Implications for  
856 Tropism and Pathogenesis. *Viruses* **12**, (2020).  
857
- 858 45. Kishiro Y, Kagawa M, Naito I, Sado Y. A novel method of preparing rat-monoclonal antibody-  
859 producing hybridomas by using rat medial iliac lymph node cells. *Cell Struct Funct* **20**, 151-156 (1995).  
860
- 861 46. Sekimoto T, Nakajima K, Tachibana T, Hirano T, Yoneda Y. Interferon-gamma-dependent nuclear  
862 import of Stat1 is mediated by the GTPase activity of Ran/TC4. *J Biol Chem* **271**, 31017-31020 (1996).  
863
- 864 47. Kimoto C, *et al.* Functional characterization of importin  $\alpha 8$  as a classical nuclear localization signal  
865 receptor. *Biochim Biophys Acta* **1853**, 2676-2683 (2015).

866

867 48. Miyamoto Y, *et al.* Importin  $\alpha$  can migrate into the nucleus in an importin  $\beta$ - and Ran-independent  
868 manner. *EMBO J* **21**, 5833-5842 (2002).

869

870 49. Miyamoto Y, Oka M. Data on dimer formation between importin  $\alpha$  subtypes. *Data Brief* **7**, 1248-1253  
871 (2016).

872

873 50. Miyamoto Y, *et al.* Genetic loss of importin  $\alpha 4$  causes abnormal sperm morphology and impacts on  
874 male fertility in mouse. *Faseb j* **34**, 16224-16242 (2020).

875

876 51. Shema Mugisha C, *et al.* A Simplified Quantitative Real-Time PCR Assay for Monitoring SARS-CoV-  
877 2 Growth in Cell Culture. *mSphere* **5**, (2020).

878

879 52. Sanjana NE, Shalem O, Zhang F. Improved vectors and genome-wide libraries for CRISPR screening.  
880 *Nat Methods* **11**, 783-784 (2014).

881

882 53. Edmonds J, *et al.* A novel bacterium-free method for generation of flavivirus infectious DNA by circular  
883 polymerase extension reaction allows accurate recapitulation of viral heterogeneity. *Journal of virology*  
884 **87**, 2367-2372 (2013).

885

886 54. Torii S, *et al.* Establishment of a reverse genetics system for SARS-CoV-2 using circular polymerase  
887 extension reaction. *bioRxiv : the preprint server for biology*, 2020.2009.2023.309849 (2020).

888

889 55. Consortium G. The GTEx Consortium atlas of genetic regulatory effects across human tissues. *Science*  
890 **369**, 1318-1330 (2020).

891

892 56. The GTEx Consortium atlas of genetic regulatory effects across human tissues. *Science* **369**, 1318-1330  
893 (2020).

894

895

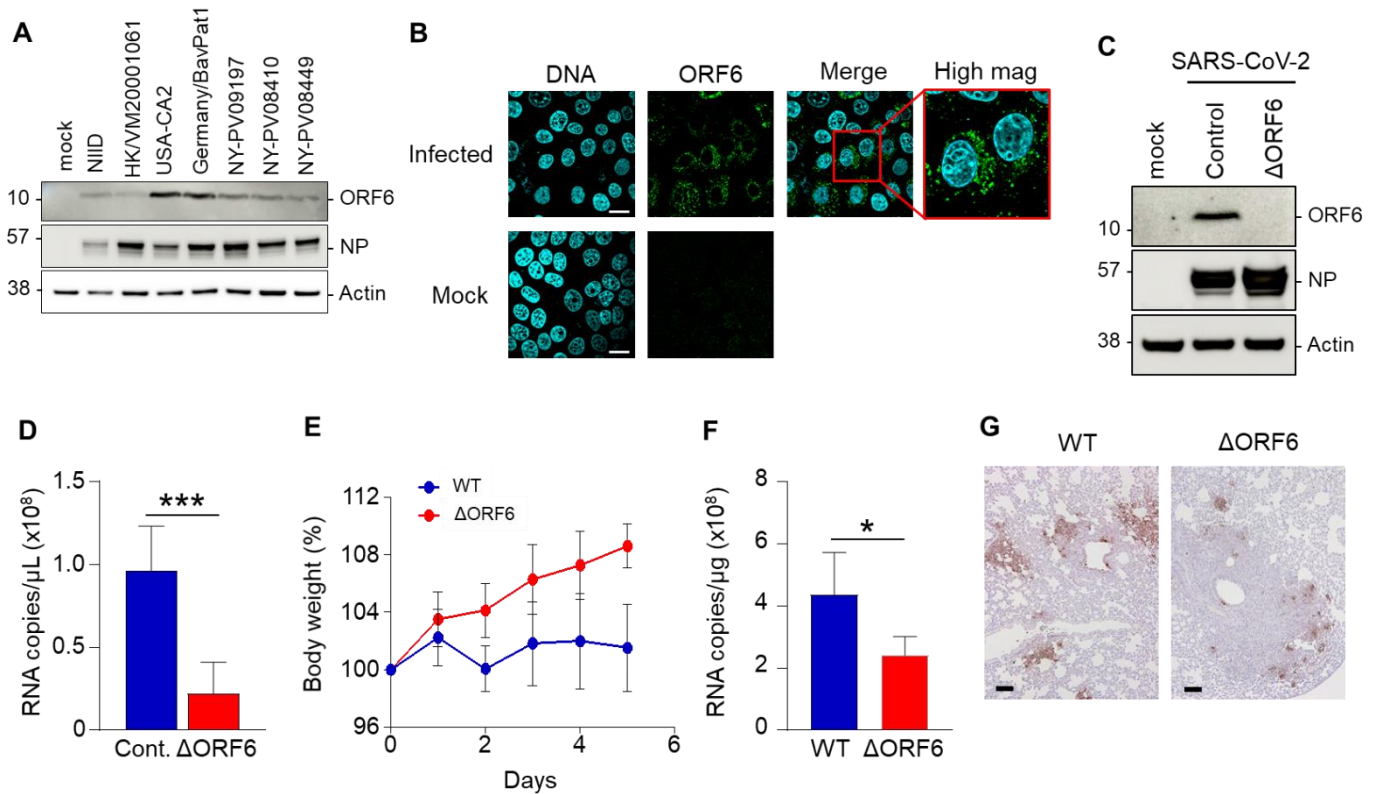

**Figure 1. Mutated viruses reveal the virulence of ORF6 in SARS-CoV-2 replication**

**A.** Identification of ORF6 in different SARS-CoV-2 strains by a newly established antibody. VeroE6/TMPRSS2 cells were infected with several SARS-CoV-2 strains, and cell lysates were collected for detection of the ORF6 protein using western blotting. NIID: 2019-nCoV/Japan/TY/WK-521/2020 strain was isolated at the National Institute of Infectious Diseases. The nucleoprotein (NP) and Actin were used as an infection control and internal control, respectively. **B.** Indirect immunofluorescence of ORF6 in VeroE6/TMPRSS2 cells infected with or without (sham) SARS-CoV-2 from NIID. The squares with a red line show a magnified merge image. Scale bars: 20  $\mu\text{m}$ . **C.** VeroE6/TMPRSS2 cells were infected with SARS-CoV-2 WT (Nluc-2A-ORF6) or  $\Delta$ ORF6 and the cell lysates were collected at 24 h post infection. Cell lysates were subjected to western blotting, and then detected the proteins using specific antibodies for ORF6, NP, or Actin. **D.** Huh7-ACE2 cells were infected with SARS-CoV-2 WT (Nluc-2A-ORF6) or  $\Delta$ ORF6 and supernatants were collected at 24 h post infection. Viral RNA in the supernatants was quantified using qRT-PCR. \*\*\* $P < 0.001$ , two-tailed Student's t-test. **E.** Percent body weight changes were calculated for all hamsters infected with SARS-CoV-2 WT or  $\Delta$ ORF6. Data are mean  $\pm$  SD from four independent animals. **F.** Viral RNA in lung homogenates from hamsters was quantified using qRT-PCR. \* $P < 0.05$ , two-tailed Student's t-test. **G.** Immunohistochemistry of SARS-CoV-2 antigen (NP protein) in lung lobes of hamster infected with SARS-CoV-2 WT or  $\Delta$ ORF6, respectively. Scale bars: 100  $\mu\text{m}$ .



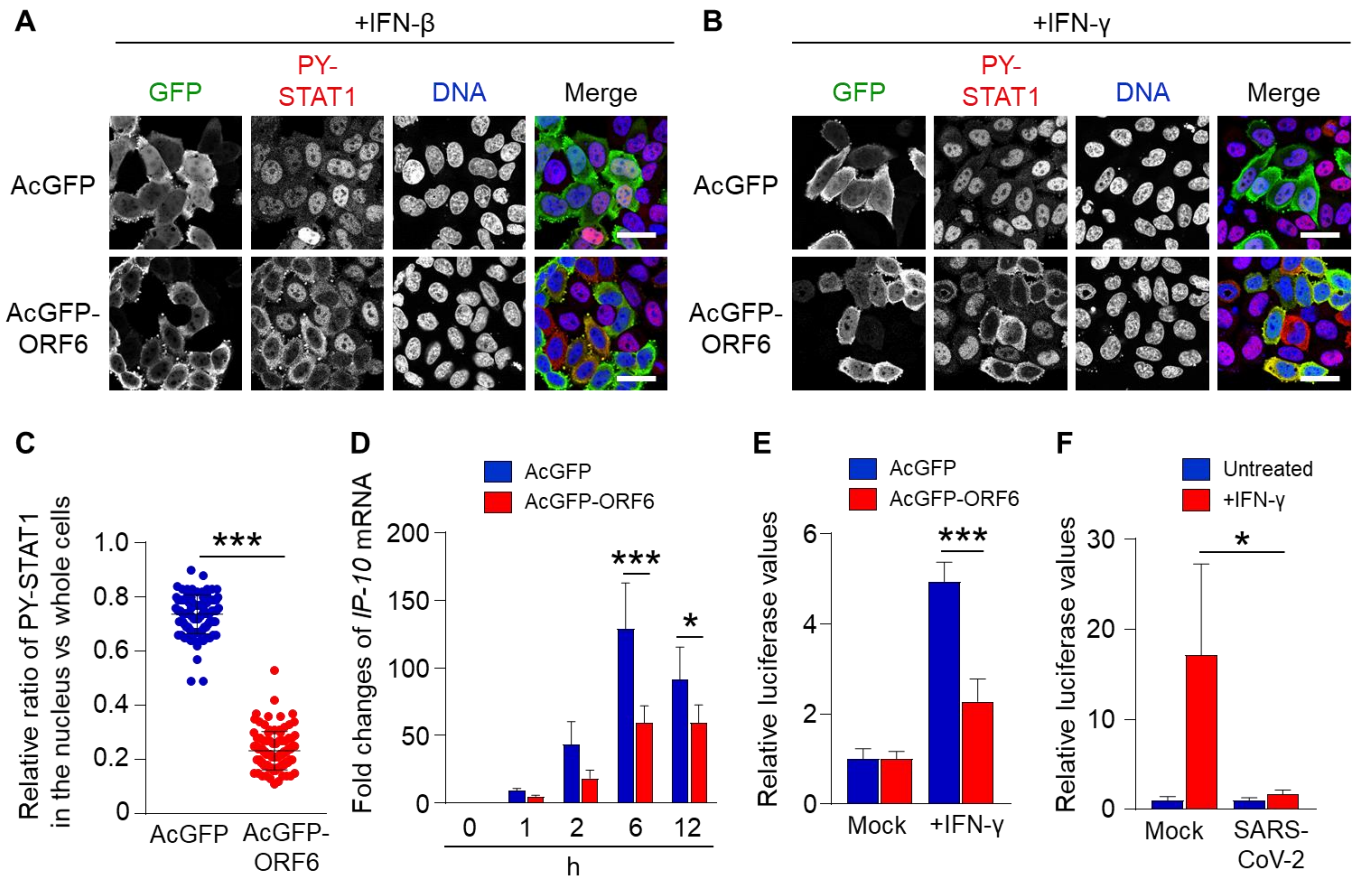

**Figure 2. Inhibition of nuclear localization of PY-STAT1 by ORF6**

**A-B.** Immunofluorescence of phosphorylated STAT1 (PY-STAT1) in HeLa cells transfected with AcGFP or AcGFP-ORF6 following IFN- $\beta$  (**A**) or IFN- $\gamma$  (**B**). AcGFP (green) and PY-STAT1 (red) were identified using specific antibodies. DAPI staining (blue) was used for DNA staining. Scale bars: 30  $\mu$ m. **C.** The graph represents the relative fluorescence values of PY-STAT1 in the nucleus compared to those of the whole cells (shown in **B**). Signal intensities of total 100 different nuclei from two independent experiments. \*\*\* $P < 0.001$ , two-tailed Student's t-test. **D.** qRT-PCR analysis of *IP-10* mRNA in AcGFP and AcGFP-ORF6-transfected HeLa cells at the described time points ( $n = 4$  each). \* $P < 0.05$ , \*\*\* $P < 0.001$ , two-way ANOVA. **E.** Relative luciferase values of ISRE-TA-Luc in AcGFP and AcGFP-ORF6-transfected Huh7 cells upon IFN- $\gamma$  stimulation. \*\*\* $P < 0.001$ , one-way ANOVA. **F.** Relative luciferase values in VeroE6/TMPRSS2 cells infected with SARS-CoV-2 (NIID strain). \* $P < 0.05$ , one-way ANOVA.

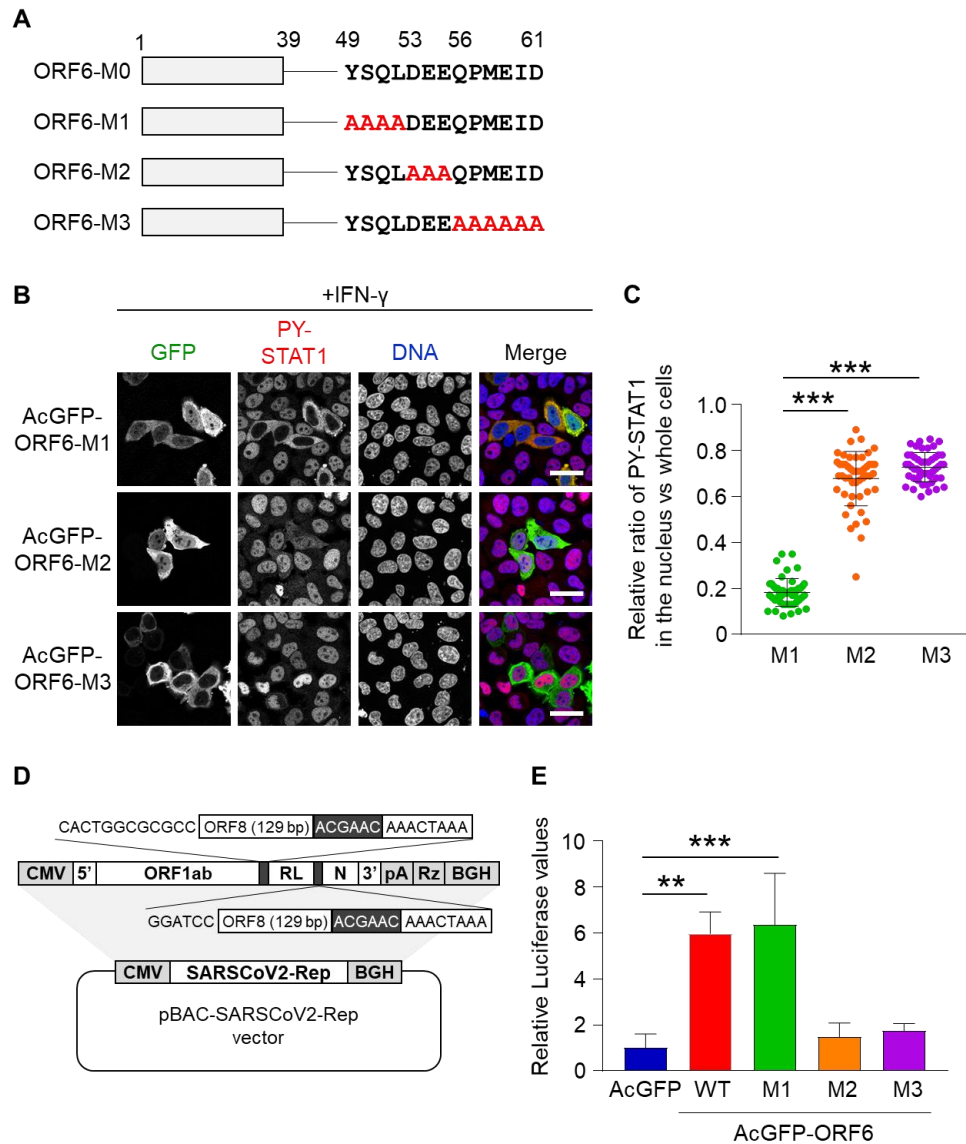

**Figure 3. The C-terminal region of ORF6 contributes to viral RNA replication**

**A.** Schematic representation of ORF6 wild type (WT) and its alanine substitution mutations within the C-terminus. ORF6-M0: wild type ORF6; ORF6-M1: ORF6 with amino acids 49-52 substituted for alanine; ORF6-M2: ORF6 with amino acids 53-55 substituted for alanine; ORF6-M3: ORF6 with amino acids 56-61 substituted for alanine. **B.** Immunofluorescence of PY-STAT1 in HeLa cells transfected with the AcGFP-ORF6 mutants following IFN- $\gamma$  stimulation. DAPI was used to stain the DNA. Scale bars: 30  $\mu$ m. **C.** The graph represents the relative fluorescence values in the nucleus compared to those of the whole cells in **B**. Signal intensities of total 50 nuclei from two independent experiments were measured. \*\*\* $P < 0.001$ , one-way ANOVA. **D.** Schematic representation of SARS-CoV-2 replicon DNA, pBAC-SCoV2-Rep. The genetic structure of the SARS-CoV-2 replicon is shown at the top of the panel. The dark shaded box indicates the core sequence of transcription regulating sequence. CMV, cytomegalovirus promoter; RL, Renilla luciferase gene; pA, a synthetic poly(A) tail; Rz, hepatitis delta virus ribozyme; BGH, bovine growth hormone polyadenylation sequence. **E.** Relative luciferase values for each ORF6 mutant in replicon ( $n=3$ ). \*\* $P < 0.01$ , \*\*\* $P < 0.001$ , one-way ANOVA.

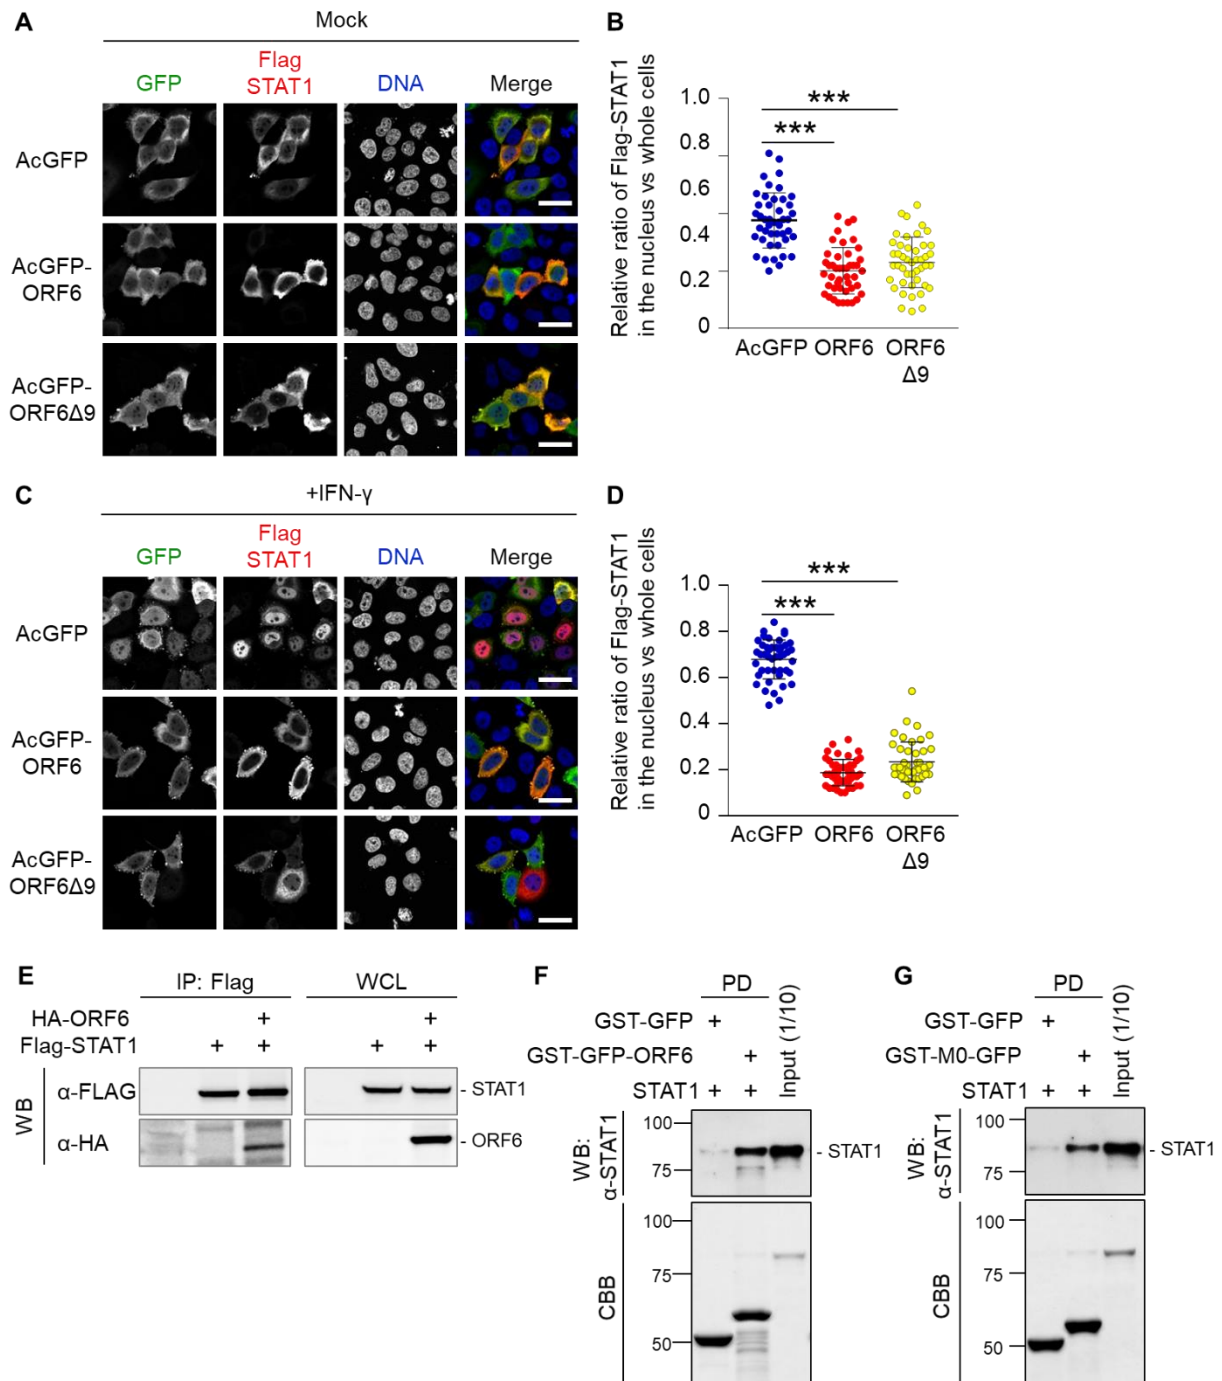

### Figure 4. ORF6 directly binds to STAT1

**A.** Immunofluorescence of Flag-STAT1 in HeLa cells transfected with AcGFP, AcGFP-ORF6 WT or AcGFP-ORF6 $\Delta$ 9 (anti-GFP or anti-Flag antibodies were used). DAPI was used to stain the DNA. Scale bars: 30  $\mu$ m. **B.** The graph represents the relative fluorescence values of Flag-STAT1 in the nucleus compared to those of the whole cells in **A**. Signal intensities from total 45 nuclei from two independent experiments. \*\*\* $P$  < 0.001, one-way ANOVA. **C.** Immunofluorescence of Flag-STAT1 in HeLa cells transfected with AcGFP, AcGFP-ORF6 WT or AcGFP-ORF6 $\Delta$ 9 following IFN- $\gamma$  stimulation. Anti-GFP or anti-Flag antibodies were used for detection. DAPI was used to stain the DNA. Scale bars: 30  $\mu$ m. **D.** The graph represents the relative fluorescence values of Flag-STAT1 in the nucleus compared to those of the whole cells in **C**. Signal intensities from total 45 nuclei

from two independent experiments were measured. \*\*\* $P < 0.001$ , one-way ANOVA. **E.** Immunoprecipitation of ORF6 was used to detect the binding with STAT1. HEK293 cells were transiently transfected with HA fused AcGFP-ORF6 (HA-ORF6) and Flag-STAT1 for 24 h. Cell lysates were subjected to immunoprecipitation using an anti-Flag antibody. Following the immunoprecipitation, the samples were western blotted with the anti-Flag antibody or the anti-HA antibody, respectively. **F.** GST-GFP and GST-GFP-ORF6 immobilized on glutathione Sepharose beads were incubated with the bacterially purified STAT1 recombinant protein for 1 h. The bottom panel represents the proteins bound to the beads and stained with Coomassie Brilliant Blue (CBB). Input is 1/10th of the amount of STAT1 used for the reaction. **G.** GST-GFP or GST-GFP fused with the C-terminal peptide of ORF6 wild type (49-61 amino acids; GST-M0-GFP) immobilized on glutathione Sepharose beads was incubated with the STAT1 recombinant protein for 1 h. The bottom panel represents the proteins bound to the beads and stained with CBB. Input is 1/10th of the amount of STAT1 used for the reaction.

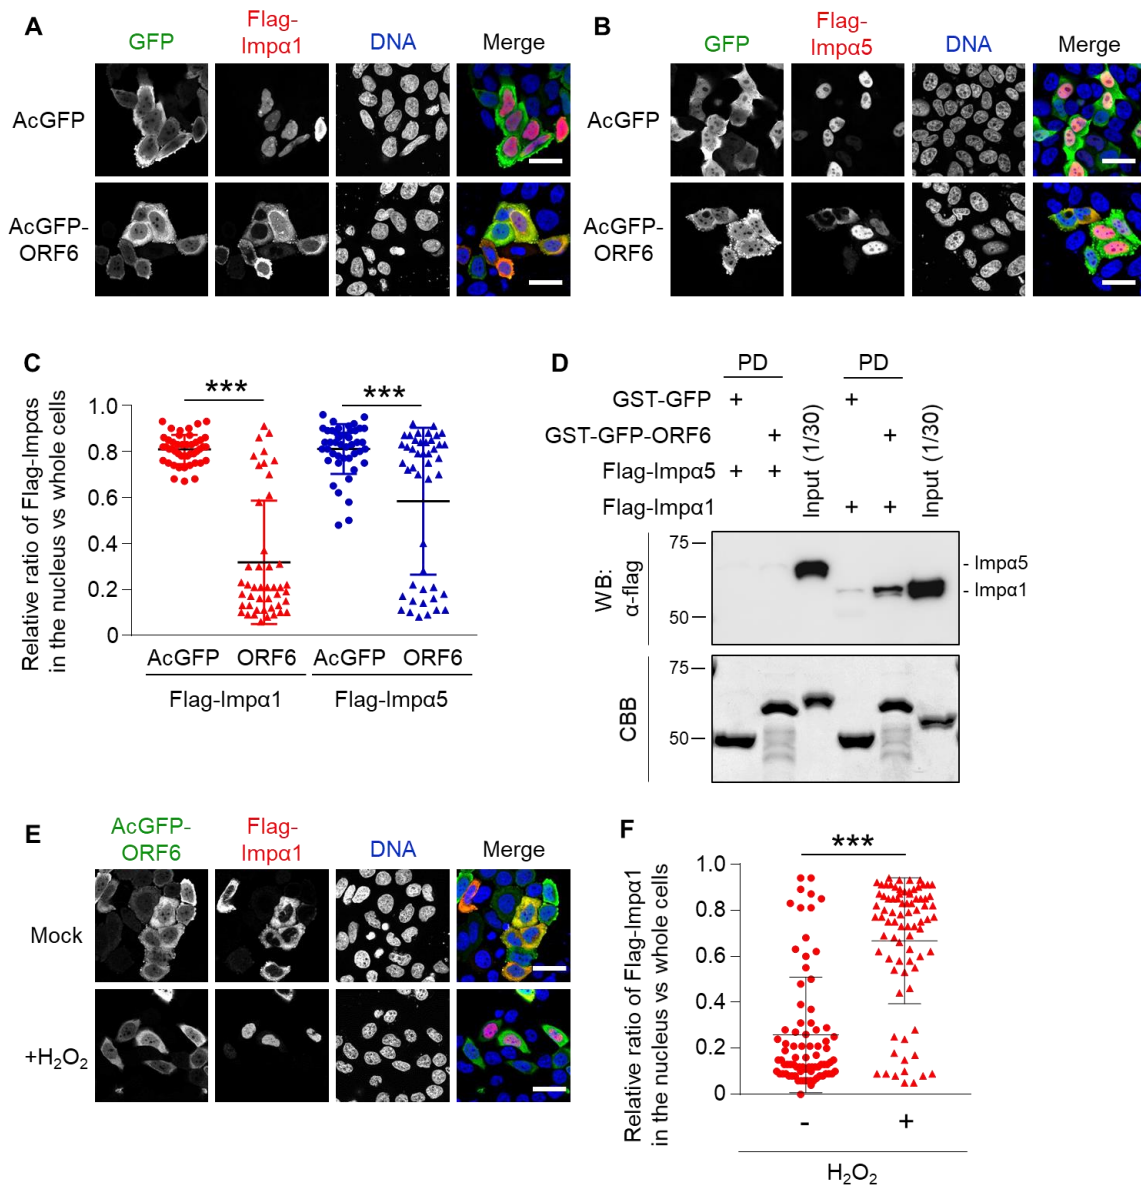

### Figure 5. ORF6 affects the subcellular localization of importin $\alpha$ proteins

**A-B.** Immunofluorescence of Flag-importin  $\alpha$ 1 (Flag-Imp $\alpha$ 1) and Flag-importin  $\alpha$ 5 (Flag-Imp $\alpha$ 5) in HeLa cells transfected with AcGFP or AcGFP-ORF6. Anti-GFP or anti-Flag antibodies were used for detection. DAPI was used to stain the DNA. Scale bars: 30  $\mu$ m. **C.** The graph represents the relative fluorescence values of the nucleus compared to those of the whole cells in **A** and **B**. Signal intensities of total 50 nuclei from two independent experiments were measured. \*\*\* $P < 0.001$ , two-tailed Student's t-test. **D.** GST-GFP and GST-GFP-ORF6 were immobilized on glutathione Sepharose beads and incubated with bacterially purified Flag-importin  $\alpha$ 1 (Flag-Imp $\alpha$ 1) or Flag-importin  $\alpha$ 5 (Flag-Imp $\alpha$ 5) for 1 h. The importin  $\alpha$  proteins were detected using an anti-Flag antibody. The bottom panel represents the proteins bound to the beads and stained with CBB. Inputs are 1/30th of the amount of each importin  $\alpha$  that was used for the reaction. **E.** Immunofluorescence of Flag-importin  $\alpha$ 1 (Flag-Imp $\alpha$ 1) in HeLa cells transfected with AcGFP-ORF6 with or without hydrogen peroxide (200  $\mu$ M H<sub>2</sub>O<sub>2</sub>) for 30 min. Anti-GFP or anti-Flag antibodies were used for detection. DAPI was used to stain the DNA. Scale bars: 30  $\mu$ m. **F.** The graph represents the relative fluorescence values of the nucleus compared to those of the

whole cells in **E**. Signal intensities of total 80 nuclei from two independent experiments were measured. \*\*\* $P < 0.001$ , two-tailed Student's t-test.

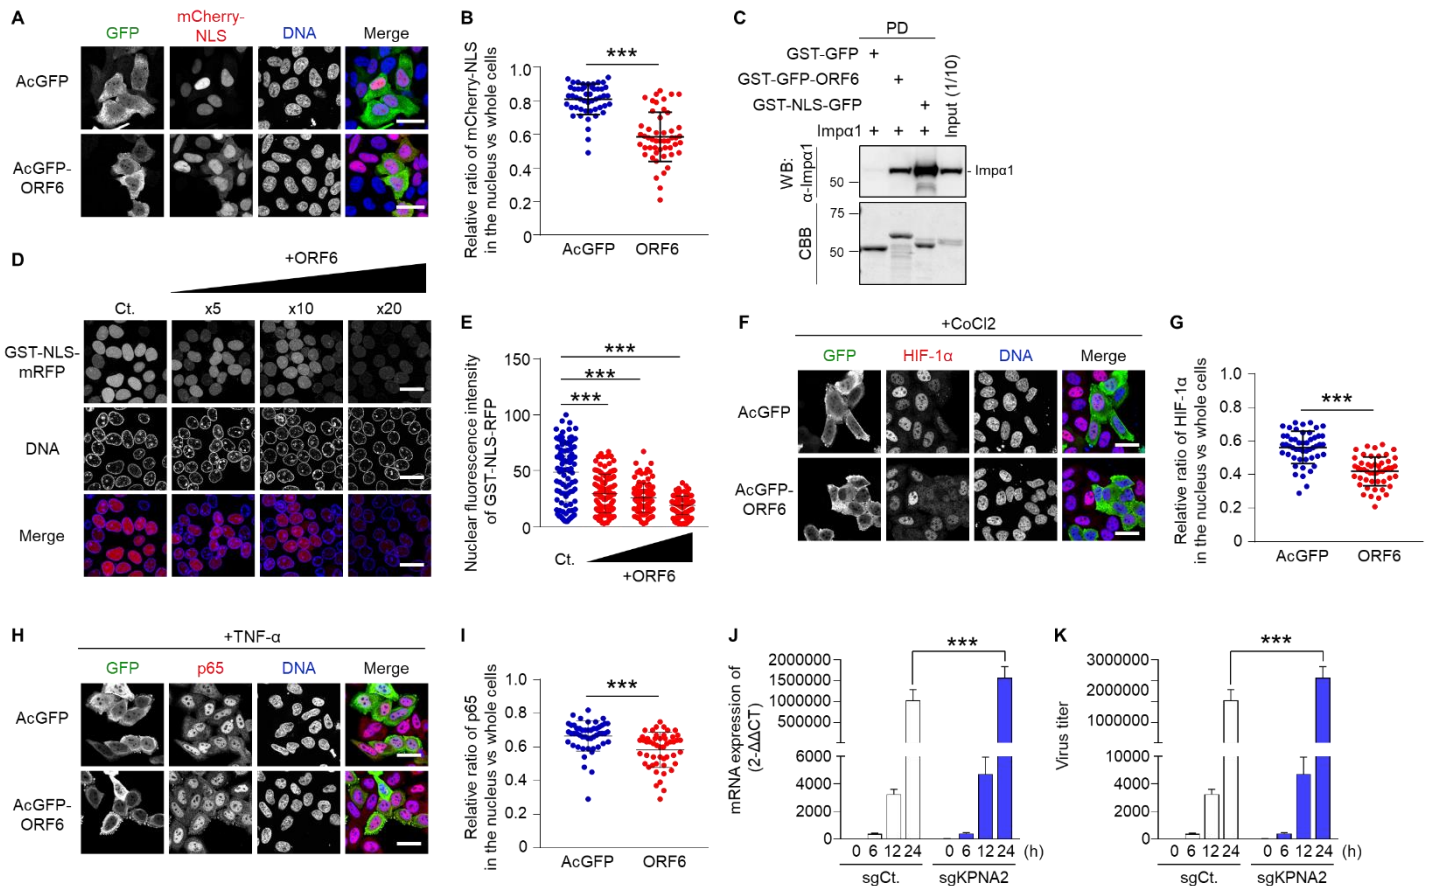

### Figure 6. ORF6 modestly disrupts the importin $\alpha/\beta$ pathway

**A.** Subcellular localization of mCherry-NLS in HeLa cells transfected with AcGFP or AcGFP-ORF6. DAPI was used to stain the DNA. Scale bars: 30  $\mu$ m. **B.** The graph represents the relative fluorescence values of the nucleus compared to those of the whole cells in **A**. Signal intensities of total 50 nuclei from two independent experiments were measured. \*\*\* $P < 0.001$ , two-tailed Student's t-test. **C.** GST-GFP, GST-GFP-ORF6 or GST-NLS-GFP were immobilized on glutathione Sepharose beads and incubated with importin  $\alpha$ 1 (Imp $\alpha$ 1) for 1 h. The bottom panel represents the proteins bound to the beads and stained with CBB. Inputs are 1/10th of the amount of each importin  $\alpha$  that was used for the reaction. **D.** An *in vitro* semi-intact nuclear transport assay was performed to measure the nuclear import of GST-NLS-mRFP in the presence of AcGFP-ORF6. Digitonin-permeabilized HeLa cells were incubated with GST-NLS-mRFP, importin  $\alpha$ 1, importin  $\beta$ 1, RanGDP, p10/NTF2, GTP, and ATP regeneration system. The reaction mixture was added 5 $\times$ , 10 $\times$ , or 20 $\times$  concentration of AcGFP-ORF6 compared to that of the NLS-substrate. After incubation for 30 min, the mRFP signals were detected using a fluorescence microscope. DAPI was used to stain the DNA. Scale bars: 30  $\mu$ m. **E.** The graph represents the nuclear fluorescence values of GST-NLS-mRFP in **D**. Signal intensities of total 100 nuclei were measured and the statistically analyzed using a one-way ANOVA (\*\*\* $P < 0.001$ ). **F.** Immunofluorescence of HIF-1 $\alpha$  in HeLa cells transfected with AcGFP or AcGFP-ORF6 following CoCl<sub>2</sub> treatment. Anti-GFP or anti-Flag antibodies were used for detection. DAPI was used to stain the DNA. Scale bars: 30  $\mu$ m. **G.** The graph represents the relative fluorescence values of the nucleus compared to those of the entire cells in **F**. Signal intensities of total 50 nuclei from two independent experiments were measured. \*\*\* $P < 0.001$ , two-tailed Student's t-test. **H.**

Immunofluorescence of NF- $\kappa$ B p65 in HeLa cells transfected with AcGFP or AcGFP-ORF6 following TNF- $\alpha$  stimulation. Anti-GFP or anti-Flag antibodies were used for detection. DAPI was used to stain the DNA. Scale bars: 30  $\mu$ m. **I.** The graph represents the relative fluorescence values of the nucleus compared to whole cells in **H.** Signal intensities of total 50 nuclei from two independent experiments were measured. \*\*\*P < 0.001, two-tailed Student's t-test. **J-K.** Huh7 cells expressing the ACE2 receptor (Huh7-ACE2) introduced with sgControl (sgCtl) or sgKPNA2 were infected with SARS-CoV-2 and supernatants were collected at 0, 6, 12, and 24 h. Intracellular viral RNA was quantified using qRT-PCR (**J**) while the viral titers (**K**) were quantified using plaque forming assay. Statistical significance was determined using a two-way ANOVA (\*\*\*P < 0.001).



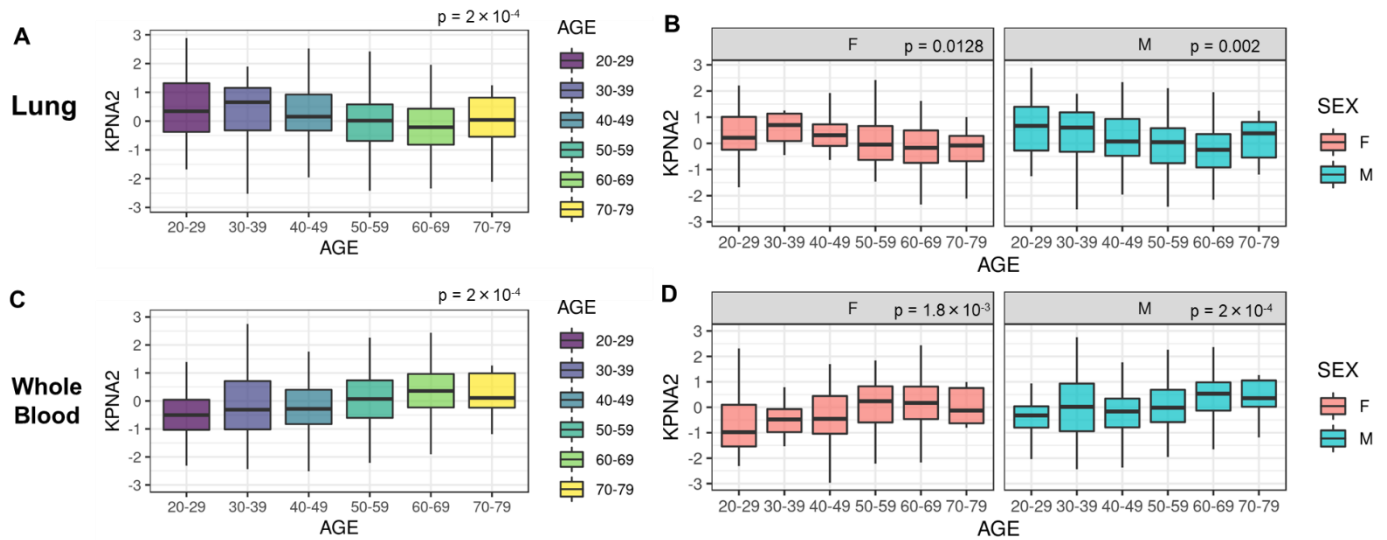

**Figure 7. Expression levels of *KPNA2* gene for different age categories.**

GTEX donors whose estimated ancestry was EUR ( $n = 436$  for lung tissues in **A** and **B**, and  $n = 558$  for whole blood in **C** and **D**) were used. *P*-values for the trends between *KPNA2* expression levels and age categories were obtained using the two-sided Jonckheere-Terpstra test. The box represented the first and third quartiles and the center line represented the median. The upper whisker extended from the hinge to the highest value that is within the  $1.5 \times \text{IQR}$  of the hinge, the lower whisker extended from the hinge to the lowest value within the  $1.5 \times \text{IQR}$  of the hinge, and the data beyond the end of the whiskers were plotted as points. F, female; M, male; IQR, interquartile range.
